1 **Unbiased placental secretome characterization identifies candidates for pregnancy complications**

2 Napso T<sup>1</sup>, Zhao X<sup>1</sup>, Ibañez Lligoña M<sup>1</sup>, Sandovici I<sup>1,2</sup>, Kay RG<sup>3</sup>, Gribble FM<sup>3</sup>, Reimann F<sup>3</sup>, Meek CL<sup>3</sup>,  
3 Hamilton RS<sup>1,4</sup>, Sferruzzi-Perri AN<sup>1\*</sup>.

4

5 Running title: Placenta secretome identifies biomarkers of pregnancy health

6

7 <sup>1</sup>Centre for Trophoblast Research, Department of Physiology, Development and Neuroscience,  
8 University of Cambridge, Cambridge, UK.

9 <sup>2</sup>Metabolic Research Laboratories, MRC Metabolic Diseases Unit, Department of Obstetrics and  
10 Gynaecology, The Rosie Hospital, Cambridge, UK.

11 <sup>3</sup>Wellcome-MRC Institute of Metabolic Science, Addenbrooke's Hospital, Cambridge, UK.

12 <sup>4</sup>Department of Genetics, University of Cambridge, Cambridge, UK.

13

14 \*Author for correspondence:

15 Amanda N. Sferruzzi-Perri

16 Centre for Trophoblast Research,

17 Department of Physiology, Development and Neuroscience,

18 University of Cambridge,

19 Cambridge, UK CB2 3EG

20 [ans48@cam.ac.uk](mailto:ans48@cam.ac.uk)

21

22

23 **Abstract**

24 Pregnancy requires adaptation of maternal physiology to enable normal fetal development. These  
25 adaptations are driven, in part, by the production of placental hormones. Failures in maternal  
26 adaptation and placental function lead to pregnancy complications including abnormal birthweight  
27 and gestational diabetes. However, we lack information on the full identity of hormones secreted by  
28 the placenta that mediate changes in maternal physiology. This study used an unbiased approach to  
29 characterise the secretory output of mouse placental endocrine cells and examined whether these  
30 data could identify placental hormones that are important for determining pregnancy outcome in  
31 humans. Secretome and cell peptidome analyses were performed using mass spectrometry on  
32 cultured primary trophoblast and fluorescence-activated sorted endocrine cells from pregnant mouse

33 dams, and a placenta secretome map containing 319 proteins was generated. Gene ontology analyses  
34 showed that a high proportion of placental secretome proteins are involved in metabolic and immune  
35 modulation, signalling and growth. The majority of proteins identified are also expressed by human  
36 placenta and several have been reported to be dysregulated in pregnancy complications. Moreover,  
37 in proof of concept studies, we found that the relative abundance of secreted placental proteins  
38 (sFLT1/MIF and ANGPT2/MIF ratios) was increased in women at 12 weeks of pregnancy, prior to  
39 diagnosis of gestational diabetes. Finally, we identified several transcription factors that may be  
40 important for controlling hormone production by the placenta and associate with pregnancy outcome.  
41 Thus, our observations suggest that analysis of the placental secretome could lead to the identification  
42 of new placental biomarkers of pregnancy complications.

43

#### 44 **Introduction**

45 The placenta forms the functional interface between the mother and fetus that is essential for fetal  
46 development and growth during pregnancy. It is responsible for secreting a plethora of endocrine  
47 mediators that induce local and systemic changes in the mother to enable fetal nutrient and oxygen  
48 transfer and prevent immunological rejection of the fetus<sup>1</sup>. Aberrant placental function can lead to  
49 insufficient or inappropriate adaptations in maternal physiology, with consequences for pregnancy  
50 outcome and with immediate and lifelong impacts on the health of both the mother and child<sup>2</sup>.  
51 Indeed, placental malfunction is a leading cause for the development of pregnancy complications,  
52 such as preeclampsia (PE), gestational diabetes mellitus (GDM) and intrauterine growth restriction  
53 (IUGR). Combined, these complications affect up to 6-8% of pregnancies in the UK  
54 (<https://www.gov.uk/government/statistics/birth-characteristics-england-and-wales-2014>).  
55 Typically, these complications are diagnosed in the second or even the third trimester of gestation,  
56 after the complication has already manifested. Moreover, current diagnosis methods, namely blood  
57 pressure and proteinuria evaluation for PE, oral glucose tolerance test for GDM and uterine fundal  
58 height and ultrasound measures for IUGR are performed at a specific time/s in gestation and the  
59 development of the complication may not be detected in some cases. Therefore, the identification of  
60 novel placental biomarkers for earlier detection and improved diagnosis of pregnancy complications  
61 is highly desirable. Moreover, the illumination of placental biomarkers may aid in the design of novel  
62 therapeutic targets for pregnancy complications.

63

64 The notion that placental biomarkers may provide diagnostic or prognostic value for pregnancy  
65 complications is a long-standing and supported concept. For instance, detection of the placental  
66 hormone, chorionic gonadotropin is used to confirm pregnancy, reduced levels of pregnancy-  
67 associated plasma protein-A (PAPP-A) in the maternal circulation are predictive of IUGR and PE<sup>3,4</sup> and  
68 an imbalance in placental derived angiogenic regulators, like soluble fms-like tyrosine kinase 1 (sFLT1)  
69 and placental growth factor (PlGF) can be predictive of PE<sup>5</sup>. However, studies in experimental animals  
70 have demonstrated that the production of many other protein hormones by the placenta could also  
71 be important in determining pregnancy outcome. In rodents, placental lactogens/prolactins (PL/PRL),  
72 growth hormone (GH) and insulin-like growth factor 2 (IGF2) modulate maternal insulin and glucose  
73 levels during pregnancy<sup>1,6,7</sup> and perturbed expression of these proteins by the placenta have been  
74 associated with GDM and abnormal fetal growth in humans<sup>8-10</sup>. The placenta also produces a wide  
75 variety of cytokines throughout pregnancy<sup>10,11</sup>, which contribute to the low grade systemic  
76 inflammation and induction of maternal insulin resistance that normally occurs in the second half of  
77 pregnancy and some data suggest that placental cytokine production is aberrant in women with poor  
78 pregnancy outcomes like PE, GDM and IUGR<sup>12</sup>. Additionally, the placenta secretes inhibins, activins  
79 and relaxins, which aid in the adaptation of the endocrine, renal, circulatory and immune systems of  
80 the mother during gestation<sup>13,14</sup>. Finally, the placenta secretes proteases, inhibitors of peptidases,  
81 binding proteins and soluble forms of receptors for steroids, growth factors, cytokines and circulating  
82 factors, like lipoproteins, which contribute to the pleiotropic endocrine regulation of maternal  
83 physiology during gestation and show some predictive value for conditions like IUGR<sup>15-18</sup>. Thus, there  
84 is likely a constellation of protein mediators secreted by the placenta that facilitate maternal  
85 adaptations and ensure adequate fetal growth, required for a healthy pregnancy outcome.

86

87 Transcriptomic analyses has informed on the repertoire of hormones expressed by the human  
88 placenta in healthy and complicated pregnancies<sup>19-22</sup>. However, these studies are conducted mainly  
89 on samples obtained at delivery and involve analysis of pieces of placenta tissue, which is  
90 heterogeneous in nature and includes trophoblast, vascular, stromal and specialised immune cell  
91 types. Moreover, as powerful a tool it may be, transcriptomic analyses on their own may not be  
92 sufficient to identify the protein hormones secreted by the placenta. This is because genes can be  
93 subjected to post-transcriptional and post-translational regulatory mechanisms, such as alternative  
94 splicing, folding, transport, localization, degradation and secretion<sup>23</sup>. Thus, analysis of the secretome,  
95 the complete list of proteins secreted by the placenta, would be invaluable for identifying placental  
96 biomarkers of maternal and fetal wellbeing that could be altered prior to the manifestation of a  
97 pregnancy complication.

98

99 The mouse is a valuable species for defining the placental secretome. This is because hormone  
100 secretion by the placenta is principally performed by trophoblast endocrine cells that are conveniently  
101 arranged into a structure, termed the junctional zone. The junctional zone is also discrete from, and  
102 forms under distinct genetic instruction to, the labyrinthine zone, which performs substrate transport  
103 function in the mouse placenta. This is in contrast to humans, where the endocrine and transport  
104 functions of the placenta are carried out by the same region/cell type, the syncytiotrophoblast (STB),  
105 preventing the specific, sole examination of placental hormone production. The mouse also offers the  
106 key advantage that tools to selectively modify and isolate endocrine cells in the placenta are now  
107 available<sup>24</sup>. Moreover, despite some variations between mice and humans, many mouse-specific  
108 hormone genes are structurally similar to those in the human and perform similar functions (e.g.  
109 PRL/PL and GH genes)<sup>1</sup>. Furthermore, many gene and protein networks regulating placental  
110 development and function overlap in the two species<sup>25,26</sup>.

111

112 Herein, we first established a method for obtaining primary cultures of mouse placental endocrine  
113 cells from which the cells and secretory output could be collected. As a complementary approach, we  
114 also employed fluorescence-activated cell sorting (FACS) to isolate endocrine cells from the placenta  
115 of mice. We used mass spectrometry to unbiasedly identify the proteins in our different mouse  
116 placental endocrine cell preparations and applied a bioinformatic pipeline to refine a placental  
117 secretome map. We then overlaid our placental secretome map to a compilation of RNA/protein  
118 expression databases publicly available for the human placenta in women with pregnancy  
119 complications, including PE, GDM and IUGR to identify secreted placental proteins that could be  
120 clinically important. As a proof of concept, we quantified the abundance of four secreted placental  
121 protein candidates (sFLT1, MIF, ANGPT2 and IGF2) and their ratios to one another in blood samples  
122 taken from women who had uneventful/healthy pregnancy outcomes and those who developed GDM  
123 (both populations were normotensive). We found that sFLT1 was altered in abundance in women with  
124 GDM and moreover, the ratios of sFLT1 or ANGPT2 to MIF were altered in the first trimester of  
125 pregnancy in women who went on to develop and be diagnosed with GDM in the second trimester of  
126 pregnancy. Finally, we identified several transcription factors that are predicted to be important for  
127 controlling endocrine function of the placenta and determining pregnancy outcome. Our methodology  
128 and novel placental secretome map may be useful in identifying additional placental biomarkers for  
129 pregnancy complications.

130

131 **Results:**

132 We first wanted to establish a method for obtaining primary cultures of mouse placental endocrine  
133 cells from which secretory output could be collected and unbiasedly characterised. We harvested  
134 placentas at day 16 of gestation from wild-type females mated with males expressing Cre-EGFP under  
135 the *Tpbpa* promoter, which is specifically active in the trophoblast endocrine cells of the junctional  
136 zone<sup>24</sup> (Figure 1A). Day 16 of gestation was chosen as this corresponds to when all the endocrine cells  
137 in the mouse placenta have differentiated and are non-proliferating. Moreover, this is when the  
138 junctional zone is largest in absolute terms. The *Tpbpa*-Cre-EGFP reporter was used to visualise the  
139 trophoblast endocrine cells, which were found to be enriched in the second layer of our Percoll  
140 gradient (between 1.028 and 1.050 g/ml; Figure 1A&B). Trophoblast cells from this layer were then  
141 cultured for up to 120h and the optimal time point for secretome analysis was identified to be 48h  
142 based on dynamics of trophoblast density (*Krt18* expression) and the levels of viability (XTT levels),  
143 necrosis (LDH levels) and apoptosis markers (*p53* and *Bax* expression) throughout the culturing (Figure  
144 1C). As expected, the 48h primary cultures contained a high density of endocrine trophoblasts, as  
145 indicated by the high expression of *Tpbpa* and comparatively very low expression of the transport  
146 labyrinth zone marker, *Mct4* (Figure 1D). These cultures contained all three types of junctional zone  
147 cells, *i.e.* the endocrine spongiotrophoblasts, glycogen cells and giant cells, as evidenced by the  
148 expression of their unique gene markers *Prl8a8*, *Gjb3* and *Hand1*, respectively (Figure 1E&F).

149

150 **Peptidome and secretome analysis of primary cultured trophoblast cells from mouse placenta**

151 We then determined the secretome of our primary mouse trophoblast endocrine cell cultures. This  
152 involved performing LC-MS/MS on both the cells and conditioned medium from the cultures at 48h  
153 and then applying a bioinformatics pipeline (Figure 1G). We identified a total of 1,534 and 1,445  
154 proteins in the cells and conditioned medium of the cultures, respectively. After considering only  
155 proteins that were detected in 4 out of 5 samples, protein lists were then converted to their  
156 corresponding gene ID and expression by the mouse placenta verified using publicly available RNA  
157 datasets (Table 1). As we wanted to ultimately translate our findings from the mouse to humans, we  
158 additionally overlaid our converted mouse gene lists with publicly available RNA datasets for the  
159 human placenta (Table 1) and performed systematic orthologue searches. To further refine our lists  
160 to secreted proteins, we applied SignalP<sup>27</sup> and gene ontology analysis<sup>28</sup> to capture proteins that  
161 employ both the "conventional", as well as "unconventional" secretion pathways<sup>29</sup> (see methods for  
162 details). This resulted in a refined list of 158 and 257 secreted proteins detected in the cultured cells  
163 and conditioned medium (110 were common between the sample types), respectively that are

164 expressed by both the mouse and human placenta. Reactome pathway analysis revealed that the  
165 proposed functions of secreted proteins in the cultured cells and conditioned medium were largely  
166 similar, with the highest scoring pathways including those involved in the immune system, neutrophil  
167 degranulation, homeostasis and insulin-like growth factor (IGF) regulation (Fig. 1H and G). All data  
168 outputs at each step of the pipeline, including the proteins/genes expressed in the mouse but not the  
169 human placenta can be found in GitHub ([https://github.com/CTR-BFX/2020-Napso\\_Sferruzi-Perri](https://github.com/CTR-BFX/2020-Napso_Sferruzi-Perri)).

170

### 171 **Peptidome and secretome analysis of sorted endocrine cells from the mouse placenta**

172 As a complementary approach to the primary trophoblast cultures, endocrine cells from the mouse  
173 placenta on day 16 of pregnancy were isolated using FACS. This was performed by mating the *Tpbpa*-  
174 Cre-EGFP mouse line to the double-fluorescent Cre reporter line, mTmG<sup>30</sup> (Figure 2A). As expected,  
175 placentas obtained from these matings showed EGFP in the junctional zone of the placenta, whereas  
176 the labyrinth, decidua and fetus were positive for tdTom (Figure 2B,C). Moreover, sorting the EGFP-  
177 positive cells provided us with highly enriched isolates of junctional zone cells (as indicated by the high  
178 expression of *Tpbpa*, with little to low detection of the *Mct4* gene; Figure 2D) containing the three  
179 major endocrine cell types of the mouse placenta (Figure 2E). Using LC-MS/MS we identified a total of  
180 1,142 proteins in the sorted placental endocrine cells (Figure 2F). Applying a similar pipeline to the  
181 analysis of cultured placental endocrine cells, we narrowed down our list of proteins obtained in the  
182 sorted placental endocrine cells to 105 secreted proteins that are shared between the mouse and  
183 human placenta (Figure 2F). Gene ontology analysis indicated that these secreted placental proteins  
184 function in pathways related to the immune system, neutrophil degranulation and metabolism of  
185 proteins, among others (Figure 2G). All data outputs at each step of the pipeline, including the  
186 proteins/genes expressed in the mouse but not the human placenta can be found in GitHub  
187 ([https://github.com/CTR-BFX/2020-Napso\\_Sferruzi-Perri](https://github.com/CTR-BFX/2020-Napso_Sferruzi-Perri)). Proteins detected in the sorted placental  
188 endocrine cells that were not predicted to be secreted were analysed by gene ontology analysis. This  
189 revealed that many proteins detected are proposed to play roles in protein synthesis, translation and  
190 metabolism, amongst others and are in line with their possible regulatory role in modulating the  
191 function of placental endocrine cells (Supplementary Figure 1 and Supplementary Table 1).

192

### 193 **Creating a placental secretome map**

194 Given that the LC-MS/MS method is unbiased, but cannot exhaustively characterize the entire  
195 proteome of a given set of samples, we then combined the lists of secreted placental proteins

196 expressed by mouse and human placenta obtained using the two methods presented above, to  
197 generate a more comprehensive placental secretome map (Figure 3A). This approach resulted in a  
198 total of 319 secreted proteins that are expressed by both mouse and human placenta (Figure 3A) and  
199 another 31 that are specific to the mouse (Supplementary Figure 2). We aligned our list of 319 secreted  
200 placental proteins with data from single-cell RNA-Seq analysis of the human placenta at 8 and 24  
201 weeks of gestation<sup>31</sup> and found that 94% of our proteins (299 out of 319) were expressed in the STB  
202 (Figure 3B and F). We also aligned our list of 319 secreted placental proteins with data on the  
203 conditioned media from trophoblast organoids prepared from first trimester human placenta<sup>32</sup> and  
204 identified 56 secreted placental proteins in common (Figure 3B). Gene ontology analysis of the  
205 complete list of 319 proteins/genes demonstrated that they play roles in the response to stimuli and  
206 stress and regulation of organismal process (Figure 3C). Moreover, many placental proteins identified  
207 are implicated in protein and signalling receptor binding and contain protein-interacting domains,  
208 such as serpin, conserved sites and the EGF-like domains, observations which are overall consistent  
209 with the notion that they are secreted (Figure 3C). Using gene expression enrichment analysis for  
210 mouse and human tissues, we found that 20 of the proteins were highly expressed (>10 fold) in the  
211 mouse placenta compared to other tissues (Figure 3D) and 4 secreted placental proteins, TFPI2,  
212 SERPINE2, IGF2 and FLT1 were enriched in the human placenta compared to other tissues (Figure 3E).  
213 Further alignment of our complete list of secreted placental proteins with single-cell RNA-Seq analysis  
214 of the human placenta revealed that several proteins were enriched predominantly in the STB,  
215 including FLT1, TFPI2 and ANGPT2 (Figure 3F). Moreover, all the proteins that we identified are  
216 reported to be expressed by the syncytiotrophoblast (STB), extravillous cytotrophoblast (EVT) or  
217 cytotrophoblast (CTB) of the human placenta.

218

### 219 **Placental secretome map is enriched in proteins that are differentially expressed in human** 220 **pregnancy complications**

221 We wanted to know whether our novel placental secretome map could help us to identify placental  
222 proteins that may serve as circulating biomarkers/diagnostic indicators of maternal and fetal  
223 wellbeing in human pregnancy. We collated publicly available RNA and protein expression datasets  
224 for the human placenta from pregnancies complicated by PE, GDM, IUGR, small for gestational age  
225 (SGA) and large of gestational age (LGA) (Table 2). We then overlaid our placental secretome map to  
226 our collated database of placental RNA/protein expression for these pregnancy complications (Table  
227 2). This identified 119 secreted proteins that were dysregulated in the human placenta in the  
228 pregnancy complications studies (Figure 4A). There was some overlap in the expression of secreted

229 placental proteins between pregnancy complications and, aside from LGA, all complications showed  
230 an altered expression of ANGPT2, FLT1, IGF2 and TIMP2 (Figure 4A). Of note, FLT1 and IGF2 are  
231 particularly enriched in the human placenta compared to other tissues (see also Figure 3F).  
232 Furthermore, we found several secreted placental proteins that were uniquely altered in specific  
233 pregnancy complications. For instance, we found 18 secreted placental proteins that were only altered  
234 in the placenta of women with GDM, 47 specifically altered in PE and 5 uniquely altered in IUGR  
235 pregnancies (Figure 4A). Of those uniquely altered in PE and IUGR, secreted placental proteins TFPI2  
236 and SERPINE2, respectively, are reported to be highly enriched in the human placenta compared to  
237 other tissues. GO analysis revealed that secreted placental proteins uniquely altered in GDM are  
238 involved in the metabolism of proteins and extracellular matrix organisation (Supplementary Table 2-  
239 A), those altered in PE largely function in the immune system and platelets (Supplementary Table 2-  
240 B) and those changed in IUGR are implicated in fibril, collagen and laminin formation (Supplementary  
241 Table 2-C).

242

#### 243 **MIF/sFLT1 and ANGPT2/MIF ratios are altered in human GDM blood samples**

244 We wanted to know whether our secretome map may be useful in identifying placental biomarkers  
245 that could be measured in the circulation of women and aid in the detection of a pregnancy  
246 complication. To test this possibility, we analysed the abundance of secreted placental proteins in  
247 blood taken from women at booking (12 weeks of gestation) and after glucose tolerance testing (28  
248 weeks of gestation) who were subsequently classified as normoglycemic or diagnosed with GDM.  
249 Maternal clinical characteristics and pregnancy outcomes for the women with normal glucose  
250 tolerance or GDM are shown in Table 3. We quantified the abundance of the following secreted  
251 placental proteins, sFLT1, ANGPT2, MIF and IGF2 as they were highly enriched in human placenta  
252 and/or differentially altered in several pregnancy complications (Figure 4A). We first visualised the cell  
253 specific expression of these proteins at the maternal–fetal interface in early human pregnancy using  
254 the CellxGene tool (<https://maternal-fetal-interface.cellgeni.sanger.ac.uk/>) based on findings from<sup>33</sup>.  
255 FLT1 was shown to be highly and mainly expressed in syncytiotrophoblast and extravillous  
256 trophoblasts (Figure 4B), whilst ANGPT2, MIF and IGF2 were more broadly expressed by trophoblast  
257 cell populations (Supplementary Figure 3). All four secreted placental proteins were detectable in the  
258 maternal circulation as early as 12 weeks of gestation (Figure 4C). Furthermore, several showed  
259 changes in abundance with gestational age and in those women who developed GDM. ANGPT2 and  
260 MIF declined in the maternal circulation between 12 and 28 weeks of gestation, in line with the  
261 reduction in placental expression indicating that the placenta is the main source (Fig 3F). However the



262 decline in MIF with gestational age was not observed in women who developed GDM (due, in part to  
263 non-significantly lower values in GDM versus healthy women at 12 weeks). Moreover, sFLT1  
264 circulating levels were overall, significantly elevated in the circulation of women with GDM diagnosis  
265 ( $p=0.05$ ). In contrast, IGF2 levels in the maternal circulation were not significantly different between  
266 12 and 28 weeks of gestation or in women who developed GDM (Figure 4C and Supplementary Figure  
267 4). As pregnancy complications can be caused by an alteration of several pathways and biological  
268 systems, it is common to evaluate the relationship between the abundance of different biomarkers.  
269 We found that the ratio of sFLT1 to MIF concentration was increased by 210% ( $p=0.0003$ ) and ANGPT2  
270 to MIF was increased by 97% ( $p=0.02$ ) in women at 12 weeks of gestation who went on to develop  
271 GDM compared to the healthy pregnancies (Figure 4D).

272

### 273 **A transcriptional network controlling placental proteome highlights links with pregnancy** 274 **complications**

275 We wanted to gain further information on the regulation of placental endocrine function and its  
276 significance for determining pregnancy outcome. To this aim, we searched for transcription factors  
277 (TFs) that had significant enrichment of binding sites at the promoters of genes encoding the 319  
278 proteins in our placental secretome map (Figure 3A). We used two computational tools, Analysis of  
279 Motif Enrichment and Ingenuity Pathway Analysis and identified 33 common TFs expressed by  
280 trophoblast cells in human placenta and controlling the expression of a total of 96 proteins from our  
281 placental secretome map (Supplementary Table 3). All of these TFs were expressed by the STB at 8  
282 weeks of gestation, when their placental secreted targets were too. Furthermore, the expression of  
283 10 of these TFs has been reported to be perturbed in human pregnancy complications (Figure 5A).  
284 These 10 TFs control the expression of 36 members of the placental proteome map, 20 of which are  
285 reported to be differentially expressed in human pregnancy complications (Figure 5B). Of note was  
286 ARNT2, which is reported to be dysregulated in PE and IUGR and implicated in the control of 10 genes  
287 encoding proteins in the placental secretome, of which 5 were further reported to be altered in  
288 pregnancy complications (Supplementary figure 3). PLAG1 and CREB1 were specifically altered in the  
289 placenta from women with GDM and proposed to be key in regulating of placental secreted proteins  
290 like IGF2 and FLT1, which were also identified as altered in expression in such pregnancies. FOS, MYCN  
291 and NFYC were found to be altered in PE pregnancies and are predicted to modulate the gene  
292 expression of up to 11 proteins in our secretome list that are also reported to be differentially  
293 expressed in PE (Figure 5A and Supplementary Table 3).

294

## 295 Discussion

296 Our study has established a comprehensive secretome map of the placenta. By utilising transgenic  
297 mouse lines for tracking placental endocrine cells, together with advanced molecular techniques and  
298 bioinformatics analysis, we have characterized a placental secretome map relevant for both mouse  
299 and human pregnancy. To achieve this, we performed mass spectrometry on three types of samples,  
300 i) primary cultures containing mouse placental endocrine cells, ii) conditioned media from primary  
301 cultures of mouse placental endocrine cells and iii) endocrine cells isolated from the mouse placenta  
302 by fluorescence-activated cell sorting. A robust bioinformatics pipeline was then used to integrate our  
303 proteins lists and to include in our analysis only proteins expressed by both the mouse and human  
304 placenta, as well as those destined to be secreted. By overlaying our secretome map to publicly  
305 available datasets for the human placenta, we were able to identify that several secreted placental  
306 proteins were altered in pregnancy complications including GDM, PE and IUGR. Moreover, in proof of  
307 concept experiments using blood samples from women who were healthy or developed GDM, our  
308 findings suggest that the relative abundance of secreted placental candidates identified using our  
309 secretome map, may be altered as early as week 12 of gestation, which predates traditional clinical  
310 diagnosis at 24 weeks. Lastly, we identified transcription factors that are likely to govern the  
311 expression of placental hormones with important implications for pregnancy outcome. Taken  
312 together, our data demonstrate that our methodology and placental secretome map may illuminate  
313 promising biomarker candidates as early diagnostic indicators and therapeutic targets for pregnancy  
314 complications linked to placental malfunction. Moreover, our methodology and findings may have  
315 relevance for understanding the significance of placental endocrine function in mammalian  
316 development and pregnancy physiology, more broadly.

317

318 Three parallel approaches were used to obtain lists of secreted placental proteins that could be  
319 integrated as a secretome map. This was fundamentally important, as we wanted to maximise our  
320 ability to detect secreted placental proteins without being limited by sample preparation, method  
321 sensitivity and specificity. We adapted published methods<sup>34-36</sup> and used the *Tpbpa*-Cre-EGFP mouse  
322 line<sup>24</sup> to obtain primary cell cultures containing a high density of mouse placental endocrine cells. By  
323 monitoring the behaviour of our cultured cells, we were able to show that at 48h of culture, cell  
324 viability was stable, with no increase in cell necrosis or cell death. Furthermore, at 48h, our primary  
325 cell cultures contained the three main endocrine cell types of the mature mouse placenta. We  
326 analysed the cultured cells and conditioned media separately, as proteins can be secreted at low  
327 concentrations into the culture media, resulting in recovery difficulties. Moreover, salts and other

328 compounds in the media may interfere with protein detection<sup>37</sup>. Furthermore, highly abundant  
329 proteins can mask the detection of lowly expressed proteins, resulting in selective detection or a mis-  
330 representation of the proteome when analysing cultured cells<sup>38</sup>. To further increase the sensitivity of  
331 detecting secreted placental proteins, we concentrated the conditioned media of our primary cell  
332 cultures prior to mass spectrometry and likely due to this, we obtained a larger list of secreted  
333 placental proteins from the conditioned media (26 proteins in the mouse and 257 in mouse and  
334 human) compared to the cultured cells (5 proteins in mouse and 158 in mouse and human). However,  
335 our primary placental endocrine cell cultures were not pure, and cells may alter their protein  
336 expression when cultured. As a complementary approach, we also identified the proteins in freshly  
337 isolated mouse placental endocrine cells using the *Tpbpa*-Cre-EGFP and mTmG murine lines and  
338 fluorescence-activated cell sorting. This approach delivered highly pure samples containing all three  
339 placental endocrine lineages. However, some trophoblast giant cells in the mouse placenta may have  
340 been lost due to size limitation of the nozzle for the fluorescence-activated cell sorting (100µm).  
341 Moreover, both the preparation of primary cultures and fluorescence-activated sorting of mouse  
342 placental endocrine cells resulted in a relatively lower abundance of glycogen cells than expected for  
343 the mouse placenta at day 16 (normally the relative proportion of endocrine cell types is  
344 spongiotrophoblast > glycogen cells > trophoblast giant cells). This is somewhat expected, as glycogen  
345 cells are sensitive to lysis and may thus be particularly sensitive to the sample preparation technique<sup>39</sup>.  
346 Nevertheless, 112 secreted placental proteins (7 proteins in mouse and 105 in mouse and human)  
347 were detected in the pure placental endocrine cell isolates, of which 82% were also found in cultured  
348 cells. Reactome pathway analysis of individual protein lists revealed that the proposed functions of  
349 secreted proteins in the cultured cells, conditioned culture media and placental endocrine cell isolates  
350 were overall similar, with the highest scoring pathways including those related to the immune system,  
351 homeostasis and insulin-like growth factor (IGF) regulation. However, several of the proteins detected  
352 were specific to one approach/sample type, which reinforces our approach of combining different  
353 sample types/methodologies to optimise and broaden the detection of proteins secreted by the  
354 placenta. Indeed, the combination of the three methodologies enabled the creation of map of 319  
355 secreted proteins expressed by both mouse and human placenta and another 31 specific to the  
356 mouse.

357

358 Of the 319 secreted placental proteins in mouse and human, 56 were previously reported to be  
359 secreted from first trimester human trophoblast organoids<sup>32</sup>, including progranulin (GRN), insulin-like  
360 growth factor II (IGF2), insulin-like growth factor-binding protein 2 (IBP2) and macrophage migration  
361 inhibitory factor (MIF). Moreover, the majority of the proteins (300 out of 319) were localised to the

362 syncytiotrophoblast of the human placenta<sup>31</sup>, which is in direct contact with maternal blood and the  
363 primary site for hormone production in the human placenta. The predominate localisation of proteins  
364 in our secretome map to the syncytiotrophoblast in humans validates our method and highlights how  
365 data generated may improve our understanding of the role and regulation of human placental  
366 endocrine function. More than 60% of the proteins in our placental secretome map were predicted to  
367 function in “response to stimulus”. This GO term includes secondary biological groups such as  
368 regulation of signal transduction downstream of the interleukin-1 receptor type 2 (IL1R2),  
369 macrophage metalloelastase (MMP12) and apolipoprotein A-I (APOA1) that participate in the  
370 response to cytokines. It also included insulin-like growth factor-binding proteins (IGFBP2, IGFBP4 and  
371 IGFBP6), which modulate the mitogenic and metabolic actions of insulin-like growth factors that play  
372 important roles in pregnancy physiology<sup>40</sup>. Indeed, several of these proteins have been previously  
373 shown to be secreted from the human placenta, such as the IL1R2<sup>41</sup>, IGF2 and IGFBPs<sup>42</sup>, MMP12<sup>43</sup> and  
374 APOA1<sup>44</sup> and are consistent with our findings. Many of the proteins in our secretome map were also  
375 identified to be hormone binding proteins, or proteins that regulate signalling downstream of  
376 receptors. These included annexin A5 (ANXA5) an anticoagulant protein, inhibin beta A chain (INHBA),  
377 which is a subunit of both inhibin and activin, transthyretin (TTHY) a thyroid hormone-binding protein,  
378 insulin-degrading enzyme (IDE), which binds to insulin and leukaemia inhibitory factor receptor (LIFR).  
379 Whilst proteins like ANXA5, inhibins/activins, TTHY and LIFR have been previously reported to be  
380 secreted from the placenta<sup>15,45-47</sup>, we are not aware of any studies describing the secretion of other  
381 proteins, like IDE from the human placenta. Furthermore, other secreted proteins such as adipocyte  
382 enhancer-binding protein 1 (AEBP1) and Y-box-binding protein 1 (YBOX1), which can regulate  
383 transcription were also detected in the placental secretome. Again however, to date, there are no  
384 studies related to the secretion of AEBP1 and YBOX1 from the human placenta. Collectively our  
385 findings may suggest that the secretome map comprises known and novel secreted placental proteins.

386

387 Two main protein domains featured in our placental secretome map were the “Serpins conserved site”  
388 and the “EGF-like domain” which are important in regulating inflammatory processes, growth factor  
389 signalling and extracellular matrix and cytoskeletal remodelling<sup>48,49</sup>. Thus, in addition to identifying  
390 proteins secreted by the placenta with systemic actions, proteins in our secretome map may also play  
391 local autocrine and paracrine roles in modulating processes at the fetal-maternal interface, including  
392 decidual remodelling/function, immune tolerance and placentation. Using tissue gene expression  
393 enrichment analysis, we found that of the proteins in our placental secretome map, 20 were most  
394 abundantly expressed by the placenta in mouse and 4 were enriched in the placenta in human. Of  
395 note, TFPI2 a plasmin-mediated matrix remodelling, FLT1 a receptor for vascular endothelial growth

396 factor and proteins from the SERPIN family were enriched in both the mouse and human placenta.  
397 This is consistent with the findings of others showing genes and proteins in the placenta overlap in the  
398 two species<sup>25,26</sup>. Indeed, as a key aim of our work was to create a secretome map that would be  
399 applicable for both human and mouse, we used orthologue searches in our initial steps in narrowing  
400 our list of protein candidates. We found that the majority of the proteins we found in our mouse  
401 placental endocrine cell protein lists were also expressed by the human placenta, which is higher than  
402 reported previously for other placental datasets. However, of note, we found that there were an  
403 additional 31 secreted proteins in our complete placental secretome map, which were only expressed  
404 by the mouse and not the human placenta. These included 17 members of the PRL/PL gene family and  
405 7 members of the cathepsin gene family, which have both undergone robust species-specific  
406 expansion, particularly in rodents, and exhibit unique spatial expression patterns by endocrine  
407 trophoblast lineages in mice<sup>50-52</sup>. Overall, PRL/PL and cathepsin family members are thought to play  
408 divergent roles in driving physiological changes in the mother during pregnancy, including modulation  
409 of insulin production and action, vascular remodelling and immune system regulation. However,  
410 further work is required to understand the significance of individual family members to determining  
411 pregnancy outcome.

412

413 Using a collection of published datasets, we identified that around 30-40% of proteins in our placental  
414 secretome map (319 proteins expressed by human and mouse placenta) were reported to be  
415 aberrantly expressed by the human placenta in pregnancy complications. Moreover, we found 4  
416 secreted placental proteins to be differentially expressed in the placenta of women who developed  
417 PE, GDM, IUGR and SGA. This suggests that there may be common pathways related to the production  
418 of specific placental hormones, which may underlie or be reflective of the development of such  
419 pregnancy complications. Alternatively, the common expression of secreted placental proteins  
420 between these four pregnancy complications may reflect that there is overlap between these  
421 pregnancy complications, as PE often leads to IUGR or SGA and GDM is linked to PE. Interestingly, two  
422 of these proteins; FLT1 and IGF2 were highly enriched in the human placenta compared to other  
423 tissues. Moreover, circulating FLT1 (sFLT1) has been previously reported as a suitable biomarker for  
424 PE<sup>53</sup>, IUGR<sup>54</sup> and SGA<sup>55</sup>. Whilst the expression of the FLT1 gene is reported to be altered in the placenta  
425 of women with GDM, previous work has not evaluated whether sFLT1 levels are altered and could  
426 serve as a biomarker for GDM pregnancies<sup>55</sup>. Similarly, IGF2 was also reported to be altered in the  
427 placenta in PE<sup>56</sup>, IUGR<sup>57,58</sup>, GDM<sup>9</sup> and SGA pregnancies<sup>59</sup> however, less is known about changes in  
428 circulating IGF2 in the mother. Aside from being altered in LGA pregnancies, ANGPT2 and TIMP3 in  
429 our secretome map were also reported to be differentially expressed by the placenta in the pregnancy

430 complications assessed. ANGPT2 has previously been explored as predictive candidate biomarker for  
431 PE, however it was shown to be unsuccessful<sup>60</sup>. In the context of GDM, ANGPT2 has been reported be  
432 differentially secreted from cultured trophoblast of the term placenta in GDM pregnancy<sup>61</sup>, but no  
433 maternal serum analysis was described. Similarly, altered placental expression of ANGPT2 were  
434 reported for SGA<sup>62</sup> and one study has found it to serve as a predictive biomarker for IUGR<sup>63</sup>.

435

436 We identified several secreted placental proteins altered specifically in some of the pregnancy  
437 complications we studied. Analysing the gene ontology terms of these unique groups of proteins  
438 revealed that for those uniquely altered in PE, they were implicated in the control of immune  
439 processes, platelet aggregation and leukocytes like neutrophils, which is in line with previous work  
440 focussed on understanding the pathogenesis of PE in women<sup>64,65</sup>. Similarly, GO analysis of the secreted  
441 placental proteins specifically altered in GDM featured terms including protein metabolism,  
442 extracellular matrix remodelling and the control of the unfolded protein response and is consistent  
443 with studies exploring the aetiology of GDM<sup>66,67</sup>. Secreted placental proteins changed in IUGR are  
444 proposed to be involved in fibrin, collagen and laminin interactions, however the functional relevance  
445 of this finding requires further study.

446

447 As a proof of concept that our methodology and placental secretome map may be beneficial for  
448 illuminating potential circulating biomarkers with clinical relevance, four secreted placental protein  
449 (sFLT1, MIF, ANGPT2 and IGF2) were assessed in the serum of women who had normal or GDM  
450 pregnancies. All four proteins were detectable as early as 12 weeks of gestation. We found that across  
451 the two gestational time-points, sFLT1 was overall higher in the circulation of women who developed  
452 GDM. This was despite the fact that the women with GDM were normotensive. Studies previously  
453 exploring changes in sFLT1 in GDM pregnancies have yielded inconsistent results. There was no  
454 difference in circulating sFLT1 concentration in lean women with and without GDM in the third  
455 trimester of pregnancy<sup>68</sup>, and no difference in the secretion of sFLT1 by term placental explant from  
456 women who developed GDM<sup>69</sup>. However, sFLT1 has been reported to be elevated in the early second  
457 trimester (16-20 weeks of gestation) in women who went on to develop GDM in later pregnancy<sup>70</sup>,  
458 which is in line with our findings. The relationship between placental sFLT1 production and the  
459 development of GDM warrants further study.

460

461 We found that the circulating levels of ANGPT2 and IGF2 were not different between women with  
462 normal glucose tolerance or GDM at either 12 or 28 weeks of gestation. However, circulating levels of  
463 MIF in the mother failed to decline in women with GDM between these two gestational time points.  
464 Moreover, the ratios / relationships between the concentrations of MIF to sFLT1 and ANGPT2 to MIF  
465 were altered in women at week 12 of pregnancy, which is at least 10 weeks before diagnosis of GDM,  
466 suggesting that they may serve as potential early biomarkers for GDM. MIF promotes the secretion of  
467 insulin from beta cells and also increases glucose uptake by skeletal muscle<sup>71</sup>, thus its significance in  
468 development of GDM should be explored further. The value of assessing the ratio / relationship  
469 between the concentration of different biomarkers in the maternal circulation for early detection of  
470 pregnancy complications is supported by previous work showing a change in the ratio of sFLT1 to PIGF  
471 for PE, as well as IUGR in women<sup>4,72</sup>. The number of women with normal glucose tolerance and GDM  
472 in our study was small and both groups had an elevated body mass index. Further work is required to  
473 validate our findings of a change in the ratios / relationships between MIF to sFLT1 and ANGPT2  
474 concentrations in larger cohorts and in women who have a normal body mass index. Moreover, work  
475 is required to further explore the clinical value of generating a secretome map of the placenta utilising  
476 our approach.

477

478 We identified 33 transcription factors that are expressed by the STB of the human placenta and are  
479 predicted to control the gene expression of approximately 30% of the proteins in our placental  
480 secretome map (and are also expressed by the STB at the same time). Of these, ten were previously  
481 linked with pregnancy complications. These included ARNT2, which is dysregulated in the placenta of  
482 women with PE and IUGR and modulates the expression of genes that are also reported to be altered  
483 in human pregnancy complications, such as ANGPT2<sup>22,73</sup>. ARNT2 is implicated in mediating cellular  
484 responses to stimuli including hypoxia<sup>74</sup> and our findings are consistent with recent work applying  
485 novel sequencing strategies and an integrated systems biology approach<sup>75,76</sup>. We also identified  
486 transcription factors, PLAG1 and CREB1 that were altered in the placenta of GDM pregnancies and  
487 were predicted to modulate the expression of numerous proteins in our secretome map including  
488 those that were additionally differentially expressed in GDM, such as IGF2 and FLT1<sup>73,77,78</sup>. Consistent  
489 with this, CREB1 is regulated by metabolic stimuli like glucose<sup>79</sup> and PLAG1 was pinpointed as a critical  
490 factor altered in women who developed a complicated pregnancy<sup>80</sup>. In addition, both PLAG1 and  
491 CREB1 have been reported to be dysregulated in mouse genetic models showing placental dysfunction  
492 and/or poor pregnancy outcome<sup>81,82</sup>. Thus, numerous transcription factors likely govern the endocrine  
493 function of the placenta and may have significance for understanding the pathogenesis of human

494 pregnancy complications. Hence, future work should centre on testing the significance and upstream  
495 regulators of transcription factors identified as putative regulators of placental hormone production.

496

497 In summary, we have generated a comprehensive secretome map of the placenta. This map was  
498 proven to be suitable for gaining further information on the significance and regulation of placental  
499 endocrine function in mice and humans. Furthermore, we have uncovered different types of secreted  
500 placental proteins, which function in the endocrine and paracrine regulation of maternal physiology,  
501 but also possibly in an autocrine manner to modulate placental biology. Whether secreted placental  
502 proteins may reach the fetal circulation to modulate fetal growth requires further exploration.  
503 However, our placental secretome map revealed that more than 100 proteins may be differentially  
504 secreted from the placenta in complicated human pregnancies. Further work is required to extend our  
505 findings, including by employing the same methodology and bioinformatics pipeline however, using  
506 placental endocrine cells taken from other gestational ages and pregnant mice exposed to  
507 environmental conditions, such as maternal obesity, which is a risk factor for complications like PE,  
508 GDM and abnormal birthweight. This will further build knowledge on the role and control of the  
509 endocrine placenta during pregnancy and may pave the way for the discovery of novel or improved  
510 biomarkers for early detection and prevention of pregnancy complications.

511

## 512 **Methods:**

### 513 **Animals**

514 All experiments were performed under the UK Home Office Animals (Scientific Procedures) Act 1986.  
515 All mice used (wild type and transgenic) were on a C57BL/6 genetic background and housed under  
516 12h dark-light conditions with free access to water and the standard diet (RM3, special dietary  
517 services) used in the University of Cambridge Animal Facility. For the preparation of primary cultures  
518 of junctional zone trophoblast endocrine cells, wild type females were mated with males homozygous  
519 for *Tpbpa*-Cre-EGFP transgene<sup>24</sup>. For the fluorescence-activated cell sorting of junctional zone  
520 trophoblast endocrine cells, *Tpbpa*-Cre-EGFP homozygote males were mated to females homozygous  
521 for the double fluorescent Cre reporter construct, mTmG, which expresses membrane-targeted  
522 tdTomato prior to, and membrane-targeted EGFP following, Cre-mediated excision (kind gift from Dr  
523 Marika Charalambous, King's College London; <sup>30</sup>). The day a copulatory plug was found was denoted  
524 as day 1 of pregnancy (term is 20.5 days). Placentas were harvested from mouse dams that were  
525 schedule 1 killed by cervical dislocation on day 16 of pregnancy.



526

## 527 **Preparation of primary cultures of junctional zone trophoblast endocrine cells**

528 Placentas (average of 6-8 per mouse dam) were enzymatically dissociated using a buffer (Medium 199  
529 with Hank's salts, 20mM HEPES, 10mM NaHCO<sub>3</sub>, 50U penicillin/ml, and 50pg streptomycin/ml, pH 7.4)  
530 containing 0.1% collagenase and 0.002% DNase at 37°C for 1h, as described previously<sup>36</sup>. Dissociated  
531 samples were passed through a 200µm nylon filter to remove tissue debris and cells were centrifuged  
532 at 500g for 5 minutes. Cell pellets were resuspended with Medium 199 X1 and cells subsequently  
533 separated using a three layer Percoll density gradient (1.028, 1.05 and 1.088 g/ml) according to  
534 manufacturer instructions (Percoll plus, GE Healthcare Life Sciences) and as described previously<sup>83</sup> by  
535 centrifuging at 600g for 30 minutes with controlled acceleration and braking. Layers from the density  
536 gradient were recovered into medium199 X1 to dissolve the Percoll solution. Cells were then  
537 centrifuged for 5 minutes at 500g and further washed with PBSX1 prior to counting using  
538 Haemocytometer. Cells isolated from each layer of the Percoll gradient were fixed with 4% PFA for 20  
539 min and subjected to 5µ/ml of Hoechst solution for 10 min at 37°C. Cells were then visualised using  
540 fluorescence microscopy (Leica TCS SP8 Confocal laser scanning microscope) and the second layer was  
541 found to contain the greatest density of junctional zone trophoblast endocrine cells (EGFP positive  
542 cells due to Tpbpa-Cre-EGFP) and therefore used for further analysis. Namely, cells in the second  
543 Percoll density layer were seeded in 96 well plates, 8 chamber-slides or in 6 well plates (10<sup>5</sup> cells/ml)  
544 and time of seeding was defined as time 0. Cells were grown in NTCT-135 medium containing 10%  
545 fetal bovine serum, 50 IU/ml ampicillin, 50 µg/ml streptomycin, 2mM l-glutamine, 20 mM HEPES and  
546 10 mM NaHCO<sub>3</sub> and maintained in a humidified atmosphere of 5% CO<sub>2</sub> at 37°C. Cell medium was  
547 replaced every 24h. Cells were washed three times in PBSX1 and serum-free medium applied 24h prior  
548 to any downstream analysis.

549

## 550 **Viability assay**

551 Cell viability was determined using an XTT cell proliferation assay kit (Abcam- ab232856) according to  
552 manufacturer's instructions. Values were calculated as % of values at time 0h and each experiment  
553 was performed in triplicate in 8-10 independent assays.

554

## 555 **Cell death assay (LDH release assay)**

556 Cell death was determined by measuring the activity of lactate dehydrogenase (LDH) in the  
557 conditioned media of primary cell cultures using a LDH cytotoxicity assay kit, according to the  
558 manufacturer's instructions (Thermo scientific). Cell-free medium and cells treated with medium  
559 containing Triton-X were used as negative and positive controls, respectively. Each experiment was  
560 performed in triplicate in 6 independent assays.

561

#### 562 **In situ hybridisation**

563 In situ hybridization was performed on primary cell cultures seeded on chamber slides at 90%  
564 confluency ( $10^6$  cells/well) (Thermofisher Scientific, UK). Cells were fixed in 4% PFA for 30 min, washed  
565 twice with PBSX1, dehydrated in increasing concentrations of ethanol and stored in 100% ethanol at -  
566 20°C. In situ hybridization was performed using the RNAScope 2.5 RED chromogenic assay kit following  
567 the manufacturer's instructions (Bio-Techne, UK). Briefly, slides were allowed to equilibrate to room  
568 temperature and rehydrated in PBSX1. RNAScope® Hydrogen Peroxide was applied to the slides for 10  
569 min at RT, followed by RNAScope® Protease Plus in RT for 10 min. Slides were then incubated with the  
570 target or control probes at 40°C for 2h (negative control probe (310043), positive control probe  
571 (313911), Tpbpa-probe (405511), Prl8a8-probe (528641), Gjb3-probe (508841) and Hand1-probe  
572 (429651) in a HybEZ oven for 2h at 40°C. Next, slides were washed twice with wash buffer and were  
573 subjected to 6 rounds of amplification and the probe signal was developed via a reaction with fast red.  
574 Slides were then counterstained with Haematoxylin and mounted in EcoMount. Slides were scanned  
575 on a NanoZoomer 2.0-RS slide scanner (Hamamatsu, Hamamatsu City, JP) at 40x magnification.

576

#### 577 **Conditioned medium preparation for mass spectrometry**

578 Conditioned medium from cultured cells was collected at 48h of culture. At 24h prior to medium  
579 collection, cells were washed three times with PSBX1 and cultured in serum-free medium. The  
580 conditioned medium was centrifuged at 1000g for 10 min and total protein concentration measured  
581 using a Bradford assay. Proteins in the conditioned medium were concentrated up to 1.2ug/ul of total  
582 protein using cellulose membrane Ultra-4 Centrifugal Filter Unit of 3KDa cut-off (Merck) as per the  
583 manufacturer instructions.

584

#### 585 **RNA extraction and quantitative real time PCR (qPCR)**

586 Total RNA was extracted from cultured cells using RNeasy Plus Mini Kit (QIAGEN) and 0.5 µg of RNA  
587 was reverse transcribed with random hexamer primers using a High-Capacity cDNA RT kit (Applied  
588 Biosystems) according to the manufacturer's instructions. qPCR was performed using MESA BLUE  
589 qPCR Master Mix (Eurogentec) on a Bio-Rad T100 thermocycler using gene-specific intron-flanking  
590 primers (Table 4). Gene expression was analysed in triplicate and the Ct values were normalised to the  
591 expression of internal housekeeping genes (*Gapdh*, *Rpl1* and *Hprt*). Results are presented as mean ±  
592 SEM and relative to time 0h.

593

#### 594 **Fluorescence-activated cell sorting (FACS) of live cells for mass spectrometry**

595 Single cell suspensions were prepared from whole placentas digested with the dissociation buffer  
596 containing 0.1% collagenase and 0.002% DNase at 37°C for 1h, as described for the preparation of  
597 primary cell cultures. Cells were filtered through 100µM nylon filter and centrifuged at 500g for 5  
598 minutes. Cell pellets were resuspended with PBSX1 and 7AAD (Life Technologies, A1310) added prior  
599 sorting using a FACSJazz machine (BD Biosciences, Singapore). Live cells were gated and cells positive  
600 for EGFP or tdTomato were sorted and lysed directly into 80% acetonitrile (ACN) in water (v/v) in a  
601 Protein LoBind Eppendorf tube.

602

#### 603 **Mass spectrometry**

##### 604 **LC-MS/MS analysis of conditioned media**

605 Conditioned media from primary cultures of trophoblast cells were standardised to a final  
606 concentration of 2µg/µl in 4% SDS loading buffer with 100mM dithiothreitol (DTT). Samples were  
607 denatured at 95°C for 5 min and 10µg of total protein per sample was loaded onto a 12% SDS PAGE  
608 gel and run at 120 Volts. The gel was then stained with colloidal coomassie stain and washed with  
609 water. Protein bands in each lane were cut into 1mm<sup>2</sup> pieces, de-stained, reduced (using DTT) and  
610 alkylated (using iodoacetamide) and subjected to enzymatic digestion with sequencing grade Trypsin  
611 (Promega, Madison, WI, USA) overnight at 37°C. After digestion, the supernatant was pipetted into a  
612 sample vial and loaded onto an autosampler for automated LC-MS/MS analysis. All LC-MS/MS  
613 experiments were performed using a Dionex Ultimate 3000 RSLC nanoUPLC (Thermo Fisher Scientific  
614 Inc, Waltham, MA, USA) system and a Q Exactive Orbitrap mass spectrometer (Thermo Fisher Scientific  
615 Inc, Waltham, MA, USA) as described previously<sup>84</sup>.

616

617 For medium generated spectra, all MS/MS data were converted to mgf files and the files were then  
618 submitted to the Mascot search algorithm (Matrix Science, London UK, version 2.6.0) and searched  
619 against the UniProt mouse database (61295 sequences; 27622875 residues) and a common  
620 contaminant sequences containing non-specific proteins such as keratins and trypsin (115 sequences,  
621 38274 residues). Variable modifications of oxidation (M) and deamidation (NQ) were applied, as well  
622 as a fixed modification of carbamidomethyl (C). The peptide and fragment mass tolerances were set  
623 to 20ppm and 0.1 Da, respectively. A significance threshold value of  $p < 0.05$  and a peptide cut-off score  
624 of 20 were also applied. All data (DAT files) were then imported into the Scaffold program (Version  
625 4.5.4, Proteome Software Inc, Portland, OR).

626

### 627 **LC-MS/MS analysis of primary cultured cells and sorted cells**

628 Trophoblast from both primary cell cultures and fluorescence activating cell sorting were treated with  
629 800 $\mu$ L of 80% ACN in water and centrifuged for 5 min at 10,000g. The supernatant was removed and  
630 the pellet was reduced and alkylated using 50mM ammonium bicarbonate and 10mM DTT at 60°C for  
631 1h, followed by the addition of 100mM iodoacetamide in the dark for 30min. Enzymatic digestion was  
632 performed using Trypsin at 10 $\mu$ g/mL in 50mM ammonium bicarbonate overnight at 37°C (enzymatic  
633 digestion was halted by the addition of 1% formic acid). Samples were analysed by LC-MS using a  
634 Thermo Fisher Ultimate 3000 nano LC system coupled to a Q Exactive Plus Orbitrap mass spectrometer  
635 (ThermoScientific, San Jose, CA, USA) as described previously<sup>85</sup>. For generated spectra, all LC-MS files  
636 were searched using PEAKS 8.5 (Bioinformatics Solutions Inc) software against the Swissprot database  
637 (downloaded 26-Oct-2017) with a *Mus musculus* filter. For the proteins, a tryptic digestion approach  
638 was used with a semi-specific setting and up to a maximum of 3 missed cleavages. The search outputs  
639 had a 1% FDR setting applied, along with a unique peptide setting of at least 1 peptide. The precursor  
640 and product ion tolerances were 10 ppm and 0.05 Da, respectively.

641

### 642 **Bioinformatics analysis**

643 Protein/peptide annotations in LC-MS datasets were converted to their gene accession ID via UniProt  
644 (<https://www.uniprot.org/uploadlists/>). Gene lists were then overlaid with publicly available datasets  
645 for the mouse and human placenta, which are detailed in Table 1 (3 from mouse placenta and 8 for  
646 human placenta). Mouse-human ortholog searches were also undertaken using three sources of data,  
647 MGI (<http://www.informatics.jax.org/>), NCBI (<https://www.ncbi.nlm.nih.gov/homologene>) and  
648 Ensembl (biomaRt\_2.42.1 and homologene\_1.4.68 in R version 3.6.2; <https://www.R-project.org/>).

649 Then using R, a combined ortholog list for Mouse-Human was generated (details of the list and Rscript  
650 can be found in GitHub, [https://github.com/CTR-BFX/2020-Napso\\_Sferruzi-Perri](https://github.com/CTR-BFX/2020-Napso_Sferruzi-Perri)). Mouse-human  
651 ortholog results were classified as one-to-one when a gene/protein from mouse was found at the end  
652 of a node in human. Any results classified as one-to-many were excluded. Gene ontology analyses  
653 were performed using both STRING and Panther tools<sup>86</sup>. Gene enrichment analyses were conducted  
654 using TissueEnrich (tissue-specific gene enrichment analysis; <sup>87</sup>), which utilises datasets available in  
655 the Human Protein Atlas compiling RNAseq datasets from 35 human tissues<sup>88,89</sup> and the Mouse  
656 ENCODE database comprised of RNAseq datasets of 17 mouse tissues<sup>90</sup>. Refined gene/protein lists  
657 were overlaid with publicly available RNA and protein expression datasets for human pregnancy  
658 complications (Table 2) and aided by searches in Pubmed and the OMIM repository  
659 (<http://www.ncbi.nlm.nih.gov>).

660

661 To further refine our lists to secreted proteins, we applied SignalP (Signal Peptide Prediction, version  
662 4.1; <sup>27</sup>) and gene ontology analysis using four different gene ontology (GO) terms: extracellular region  
663 (GO: 0005615), extracellular exosome (GO: 0070062), extracellular region parts (GO: 0005615) and  
664 signal IP (excluding signals detected for ER lumen proteins)<sup>28</sup>. This was undertaken because SignalP  
665 can only detect the signal peptide for proteins secreted via the canonical route, which is also known  
666 as the "classic" or "conventional" secretion pathway. However, eukaryotic cells also utilize an  
667 unconventional protein secretion route for protein sorting and delivery, an "unconventional"  
668 secretion pathway, including leaderless proteins that are secreted into the extracellular space<sup>29</sup>. This  
669 approach allowed us to capture proteins that employ the "conventional", as well as "unconventional"  
670 secretion pathways. All data outputs at each step of the pipeline, including the proteins/genes  
671 expressed in the mouse but not the human placenta and the refinement of our list to secreted proteins  
672 can be found in GitHub ([https://github.com/CTR-BFX/2020-Napso\\_Sferruzi-Perri](https://github.com/CTR-BFX/2020-Napso_Sferruzi-Perri)).

673

674 To search for enrichment of transcription factor (TF) binding motifs at the promoters of the genes  
675 encoding the 319 proteins that are part of placental secretome, we first used EPD (Eukaryotic  
676 Promoter Database - <https://epd.vital-it.ch/index.php>) to retrieve the DNA sequences from 1,000bp  
677 upstream to 100bp downstream of the transcriptional start site (TSS). These sequences were then  
678 analysed using AME (Analysis of Motif Enrichment v4.12.0 - <http://meme-suite.org/tools/ame>) by  
679 selecting *Mus musculus* and HOCOMOCO Mouse (v11 FULL) as motif database. An additional search  
680 for upstream regulators was performed using the Ingenuity Pathway Analysis (IPA, Qiagen), and only  
681 TFs predicted by both tools (n=77) were selected for further analysis. Next, we filtered for TFs with

682 enriched expression in STB cells from human placenta at 8 weeks of gestation that had at least one  
683 common target gene encoding one of the 319 placental secretome proteins (n=33). Literature search  
684 led to identification of ten of those TFs that were linked with pregnancy complications. Transcriptional  
685 network visualization for the 10 TFs and the corresponding targets was performed using IPA.

686

### 687 **Human study population and sampling**

688 Peripheral blood samples were retrospectively selected for this study from women recruited via the  
689 Ophelia study (REC number 18/LO/0477 approved 5/4/2018). Inclusion criteria included (1) singleton  
690 pregnancy, (2) no evidence of severe congenital anomaly and (3) a referral for an oral glucose  
691 tolerance test (OGTT) for clinical reasons, according to NICE guidelines  
692 (<https://www.nice.org.uk/guidance/ng3>). Exclusion criteria for this study were (1) multiple pregnancy  
693 (2) severe congenital anomaly on ultrasound, (3) severe anaemia on previous blood tests, (4) previous  
694 diagnosis of diabetes outside of pregnancy and (5) medications at the time of the OGTT, which may  
695 interfere with the results of the OGTT. Screening for GDM was performed at 24 weeks of gestation  
696 using a 75 g OGTT and diagnosis of GDM was made in accordance with the IADPSG glycaemic cut-off  
697 values (fasting value  $\geq 92$  mg/dL (5.1 mmol/L), 1 h post-glucose load  $\geq 180$  mg/dL (10 mmol/L), 2 h  
698 post-glucose load  $\geq 153$  mg/dL (8.5 mmol/L))<sup>91</sup>. Blood samples were collected from pregnant women  
699 in the 1<sup>st</sup> trimester (12 weeks of gestation) and 2<sup>nd</sup> trimester (28 weeks of gestation) and were analysed  
700 for HbA1c concentration. Plasma was recovered by 2500 rpm for 10min and samples were stored at -  
701 80c. Blood pressure measurements were taken at various times in pregnancy using a calibrated  
702 automatic oscillometric sphygmomanometer (Dinamap, machine) and systolic and diastolic blood  
703 pressure recorded. For inclusion in this study, women with GDM were selected and a control group of  
704 age- and BMI-matched participants with normal glucose tolerance were included for comparison.  
705 Further details about the OPHELIA study are provided elsewhere (Research Registry number 5528)<sup>92</sup>.

706

### 707 **Human plasma analysis of protein candidates by ELISA**

708 Candidate secreted placental proteins were quantified in maternal plasma samples from healthy  
709 women and those diagnosed with GDM, using commercially available ELISAs for sFLT1 (K15190D,  
710 MSD), MIF (K151XJK-1, MSD), ANGPT2 (F21YR-3, MSD) and IGF2 (DG200, R&D) by the Core  
711 Biochemical Assay Laboratory, Cambridge and according to the manufacturer's instructions.

712

713 **Statistical analysis**

714 Data for viability, cell death and qRT-PCR are presented as mean  $\pm$  SEM. Two-way ANOVAs (with Tukey  
715 correction for multiple comparisons) or t-tests were used for determining significant differences. All  
716 analyses were performed using GraphPad Prism version 7.00 (GraphPad Software).  $P < 0.05$  was  
717 considered to indicate a statistically significant difference between the groups analysed.

718

719 **Funding**

720 This work was supported by a Royal Society Dorothy Hodgkin Research Fellowship, Academy of  
721 Medical of Sciences Springboard Grant, Isaac Newton Trust Grant and Lister Institute Research Prize  
722 grant to ANSP (grant numbers DH130036 / RG74249, SBF002/1028 / RG88501, RG97390 and  
723 RG93692, respectively). TN was supported by an EU Marie Skłodowska-Curie Fellowship  
724 (PlaEndo/703160) and an Early Career Grant from the Society for Endocrinology. CLM is supported by  
725 the Diabetes UK Harry Keen Intermediate Clinical Fellowship (DUK-HKF 17/0005712) and the EFSD-  
726 Novo Nordisk Foundation Future Leader's Award (NNF19SA058974). Work in the FR/FMG laboratory  
727 was supported by the Wellcome Trust (106262/Z/14/Z,106263/Z/14/Z), the MRC  
728 (MRC\_MC\_UU\_12012/3 and MRC -Enhancing UK clinical research grant MR/M009041/1) and the  
729 Cambridge Biomedical Research Centre (NIHR-BRC Gastrointestinal Diseases theme).

730

731

732 **Acknowledgements**

733 We would like to thank Dr Marika Charalambous, King's College London for the mTmG mouse line. We  
734 would like to thank the staff in Combined Animal Facility, as well as Dr. Jorge Lopez-Tello and Miss  
735 Bethany R.L. Aykroyd, Centre for Trophoblast Research, Department of Physiology, Development and  
736 Neuroscience, University of Cambridge for their assistance in the breeding and husbandry of mice. We  
737 would like to thank Dr. Laura Kusinski, Wellcome-MRC Institute of Metabolic Science, Addenbrooke's  
738 Hospital, Cambridge for locating the samples from pregnant women who volunteered to participate  
739 in the Ophelia study. Finally, we thank the Bioinformatics and Biostatistics (Bio2) Core Facility of the  
740 Wellcome-MRC IMS-MRL for the support provided by facilitating the access to data analysis tools.

741

742 **Conflict of Interest**

743 Authors do not have any competing financial interests in relation to the work described.

744



745 **Table 1: RNA expression database for mouse and human placenta.**

| Species      | RNA-Seq Annotation  | N                                                                 | Reference |
|--------------|---------------------|-------------------------------------------------------------------|-----------|
| <b>Mouse</b> | GSE79121            | n=1 pooled litter (day 20)                                        | 19        |
|              | GSE11224            | n=2-3 pooled litters (day 8.5 – day 20)                           | 20        |
|              | GSE11224            | n=2-3 pooled litters (day 8.5 - day 20)                           | 20        |
| <b>Human</b> | GSE9984             | n=4 first trimester<br>n=4 second trimester<br>n=4 term placentas | 93        |
|              | GSE28551            | n=16 first trimester<br>n=21 third trimester                      | 21        |
|              | GSE10588            | n=26 (term placenta)                                              | 22        |
|              | GSE25906            | n=37 (term placenta)                                              |           |
|              | GSE4707             | n=4 (term placenta)                                               |           |
|              | GSE30186            | n=6 (term placenta)                                               |           |
|              | GSE24129            | n=8 (term placenta)                                               |           |
| GSE44711     | n=8 (term placenta) |                                                                   |           |

746

747

748 **Table 2: Compilation of publicly available RNA and protein expression datasets for the human**  
 749 **placenta from complicated pregnancies.**

| Complication | Diagnosis of complication                                                                                                                                                                                                                                                                                                      | Data sets available | RNA or Protein                             | Number of samples per sample type                                                                                                                                                                                | Reference                        |
|--------------|--------------------------------------------------------------------------------------------------------------------------------------------------------------------------------------------------------------------------------------------------------------------------------------------------------------------------------|---------------------|--------------------------------------------|------------------------------------------------------------------------------------------------------------------------------------------------------------------------------------------------------------------|----------------------------------|
| <b>PE</b>    | Hypertension (systolic blood pressure $\geq 160$ mmHg and/or diastolic blood pressure $\geq 110$ mmHg) after week 20 with at least one of the following symptoms; thrombocytopenia, impaired liver function, new development of renal insufficiency, proteinuria $>5$ g in 24 hours, new-onset cerebral or visual disturbances | 4                   | RNA<br>RNA<br>RNA<br><br>RNA               | n=8 (term placenta)<br>n=12 (term placenta)<br>n=4 (syncytiotrophoblasts*)<br>n=3 (invasive cytotrophoblasts*)<br>n=4 (endovascular cytotrophoblasts*)<br><br>n=77 (7 microarray studies combined <sup>^</sup> ) | 73<br>94<br>95<br><br>22         |
| <b>GDM</b>   | Glucose intolerance determined using an oral glucose tolerance test (75g) at 24-28 weeks of gestation and revealed by either a fasting venous plasma glucose level of $>5.1$ mmol/l, and/or $>10$ mmol/l and $> 8.5$ mmol/l at 1h and 2h, respectively                                                                         | 6                   | RNA<br>RNA<br>RNA<br>RNA<br>RNA<br>Protein | n=8 (term placenta)<br>n=12 (term placenta)<br>n=19 (term placenta)<br>n=7 (term placenta)<br>n=4 (term placenta)<br>n=135 (first trimester serum)                                                               | 73<br>94<br>96<br>97<br>98<br>99 |
| <b>SGA</b>   | Birth weight $< 10^{\text{th}}$ centile                                                                                                                                                                                                                                                                                        | 2                   | RNA<br>RNA                                 | n=8 (term placenta)<br>n=12 (term placenta)                                                                                                                                                                      | 73<br>94                         |
| <b>LGA</b>   | Birth weight $> 90^{\text{th}}$ centile                                                                                                                                                                                                                                                                                        | 2                   | RNA<br>RNA                                 | n=8 (term placenta)<br>n=12 (term placenta)                                                                                                                                                                      | 73<br>94                         |
| <b>IUGR</b>  | Abnormal Doppler waveforms in the umbilical or middle cerebral artery (both $<10^{\text{th}}$ centile) and/or fetal weight and/or abdominal circumference (both $<10^{\text{th}}$ centile) and/or head circumference ( $>10^{\text{th}}$ centile)                                                                              | 3                   | RNA<br>RNA<br><br>RNA                      | n=5 (term placenta)<br>n=12 (third trimester, placental RNA from blood)<br><br>n=5 (term placenta)                                                                                                               | 100<br>80<br><br>73              |

750 \* From cell populations isolated by laser capture microdissection on human placenta from pre-term  
 751 pregnancies. <sup>^</sup> Compilation of 7 microarray datasets for the human placenta of PE pregnancies. Note  
 752 there were inconsistencies between studies in the diagnosis and inclusion criteria for these 7  
 753 microarray datasets for PE.

754

755

756 **Table 3: Clinical characteristics of women used for the analysis of circulating placental hormone**  
 757 **abundance in human pregnancy.**

| Characteristics                                | Healthy pregnancy (n=10) | GDM pregnancy (n=6) | <i>p</i> (t-test) |
|------------------------------------------------|--------------------------|---------------------|-------------------|
| Parity                                         | 1.14 ± 0.26              | 1.29 ± 0.52         | 0.78              |
| Early pregnancy BMI                            | 33.45 ± 1.78             | 35.37 ± 2.42        | 0.52              |
| GA at OGTT                                     | 28.513 ± 0.75            | 26.55 ± 1.83        | 0.28              |
| OGTT 0h (mmol/L)                               | 4.46 ± 0.07              | 5.07 ± 0.2          | <b>0.002</b>      |
| OGTT 2h (mmol/L)                               | 5.65 ± 0.23              | 7.66 ± 0.94         | <b>0.014</b>      |
| Systolic BP (mm Hg) 1 <sup>st</sup> trimester  | 116.8 ± 0.8              | 112.5 ± 1.8         | 0.386             |
| Diastolic BP (mm Hg) 1 <sup>st</sup> trimester | 71.09 ± 0.84             | 68.0 ± 2.1          | 0.576             |
| Systolic BP (mm Hg) 2 <sup>nd</sup> trimester  | 117 ± 1.75               | 122.5 ± 4.26        | 0.541             |
| Diastolic BP (mm Hg) 2 <sup>nd</sup> trimester | 70.66 ± 1.6              | 71.75 ± 3.43        | 0.855             |
| HBA1C (mmol/mol)                               | 33.42 ± 0.58             | 36.0 ± 0.53         | <b>0.01</b>       |
| GA at delivery                                 | 39.47 ± 0.41             | 38.76 ± 0.57        | 0.30              |
| Birthweight (g)                                | 3556.36 ± 126.24         | 3392.1 ± 170.00     | 0.44              |

758 GA = gestational age, BP= Blood pressure

759

760

761 **Table 4: The sequences of qRT-PCR primers used to analyse mouse placental preparations.**

| Gene          | Primers                          |
|---------------|----------------------------------|
| <i>Krt18</i>  | F: 5'-CAAGACCTGAACGATCGCCT-3'    |
|               | R: 5'-ATTCGCAAAGATCTGAGCCCT-3'   |
| <i>Tbpba</i>  | F: 5'- TGAAGAGCTGAACCACTGGA -3'  |
|               | R: 5'- CTTGCAGTTCAGCATCCAAC -3'  |
| <i>Gjb3</i>   | F: 5'- GGGGCTCTCC TCAGACATA -3'  |
|               | R: 5'- ACCTGCTAGCCACACTTGCT-3'   |
| <i>Prl8a8</i> | F: 5'- TCAGAGCTGCA TCTCACTGC -3' |
|               | R: 5'- GGGACA TCTTCA TGGCACT-3'  |
| <i>Hand1</i>  | F: 5'- GGAGACGCACAGAGAGCATT -3'  |
|               | R: 5'- CACGTCCATCAAGTAGGCCGA -3' |
| <i>Mct4</i>   | F: 5'- GGCTGGCGGTAACAGAGTA -3'   |
|               | R: 5'- CGGCCTCGGACCTGAGTATT -3'  |
| <i>p53</i>    | F: 5'-GTATTTACCCTCAAGATCCGC-3'   |
|               | R: 5'-GGAGCTAGCAGTTTGGGCTT-3'    |
| <i>Bax</i>    | F: 5'-ACCAGGGTGGCTGGGAAG-3'      |
|               | R: 5'-CCTTCCCCTTCCCCCATT-3'      |
| <i>RPII</i>   | F: 5'-AGATGTATGACGCCGACGAG-3'    |
|               | R: 5'-AATCGGTGGTGCATCTTCCA-3'    |
| <i>Gapdh</i>  | F: 5'- GGGAAATGAGAGAGGCCAG-3'    |
|               | R: 5'- GAACAGGGAGGAGCAGAGAG-3'   |
| <i>Hprt2</i>  | F: 5'- CAGGCCAGACTTTGTTGGAT-3'   |
|               | R: 5'- TTGCGCTCATCTTAGGCTT-3'    |

762

763

764

765 **Figure legends:**

766 **Figure 1: Detection of secreted proteins in primary cultures of mouse trophoblast.**

767 **A)** Workflow for the detection of secreted proteins in primary cultures of trophoblast from mice at  
768 day 16 of pregnancy. **B)** Visualisation of EGFP (*Tpbpa*-Cre-EGFP reporter) by fluorescence microscopy  
769 to identify the Percoll gradient layer containing trophoblast endocrine cells. Cells in layers were  
770 counterstained with Hoechst dye (blue) and photographed at magnification 10X (scale bar-0.6mm). **C)**  
771 Primary cell culture viability (determined by XTT), cell death (LDH release levels), trophoblast density  
772 (*Krt18* gene expression) and apoptosis (*p53* and *Bax* gene expression) from time 0 to 120h. **D)**  
773 Proportion of junctional zone (*Tpbpa* gene expression) and labyrinthine zone (*Mct4* gene expression)  
774 trophoblast at 0h and 48h. **E)** Relative abundance of the three junctional zone endocrine cell types,  
775 spongiotrophoblast, glycogen cells and giant cells (gene expression of *Prl8a8*, *Gjb3* and *Hand1*,  
776 respectively) at 0h and 48h of culture. **F)** Representative images of cells stained in situ using RNAscope  
777 probes against; *Tpbpa*, *Prl8a8*, *Gjb3* and *Hand1* to visualise trophoblast endocrine cells,  
778 spongiotrophoblast (SpT), glycogen cells (Gly) and giant cells (TGC), respectively. **G)** Pipeline and  
779 results of the analysis of proteins detected by mass spectrometry in cultured trophoblast and their  
780 conditioned medium including conversion to RNA sequences and overlay with published RNA data for  
781 the mouse and human placenta. Secreted proteins identified using SignalP and combined gene  
782 ontology (GO) terms: extracellular region, extracellular exosome, extracellular region parts and signal  
783 IP. **H and I)** Pathway over-representation analysis using Reactome pathway by STRING V.11 for the  
784 158 and 257 secreted placental proteins in cultured trophoblast and their conditioned medium,  
785 respectively that are expressed by both mouse and human placenta. XTT, LDH and gene expression  
786 data relative to geometric mean of three housekeeping genes: *Gapdh*, *RPII* and *Hprt* are presented as  
787 mean  $\pm$  SEM and expressed relative to expression at time 0h. Asterisks denote statistical significance  
788 versus time 0h, using Two-way ANOVA (B) or t-test (C-D), \*\*P<0.01, \*\*\*\*P<0.001, n=6-10 of 4 pooled  
789 litters.

790

791 **Figure 2. Detection of secreted proteins in sorted mouse trophoblast endocrine cells.**

792 **A)** Workflow for the cell sorting and protein expression analysis of mouse trophoblast endocrine cells  
793 from mice at day 16 of pregnancy. **B)** Fluorescent image of placenta showing EGFP in *Tpbpa* positive  
794 cells (junctional zone of the placenta) and tdTom for *Tpbpa* negative cells. **C)** Representative image of  
795 cell sorting of EGFP/tdTom cells by fluorescence activated cell sorting. **D)** Expression of junctional zone  
796 and labyrinth zone markers, *Tpbpa* and *Mct4*, respectively in the EGFP and TdTom sorted cells. **E)**  
797 Expression of markers for junctional zone cell types, spongiotrophoblast cell (*Prl8a8*), glycogen cells  
798 (*Gjb3*) and giant cells (*Hand1*). **F)** Pipeline and results of the analysis of proteins detected by mass  
799 spectrometry in sorted *Tpbpa*+/*EGFP* cells. **G)** Pathway over-representation analysis using Reactome  
800 pathway by STRING V.11 for the 105 secreted placental proteins expressed by both mouse and human  
801 placenta. Data presented as mean  $\pm$  SEM and genes expressed relative to geometric mean of two  
802 housekeeping genes: *RPII* and *Hprt*. Asterisks denote statistical significance to the *Tpbpa*+/*EGFP* sorted  
803 cells, using t-test, \*P<0.05, \*\*P<0.01, n=5 for each group.

804

805 **Figure 3. Secretome map of the placenta**

806 **A)** Integrating the lists of secreted placental proteins expressed by mouse and human placenta and  
807 obtained using our different methods to generate a comprehensive placental secretome map.

808 Proteins expressed by mouse but not human placenta shown in Supplementary data figure 1. **B)** Venn  
809 diagram showing the overlay of placental secretome map with first trimester trophoblast organoid  
810 secretome (Turco, 2018) and single cell RNAseq analysis for human placenta at 8 weeks of gestation  
811 (Liu, 2018). **C)** Gene ontology (GO) analysis for the 319 secreted proteins detected in placental  
812 secretome map using STRING V.11. **D and E)** Proteins in the placental secretome map that are highly  
813 enriched in the placenta of mouse (**D**) and human (**E**) compared to other tissues using TissueEnrich. **F)**  
814 Cell specific expression of the top 30 most highly expressed genes in the placental secretome map  
815 using single cell RNAseq data for the human placenta (Lui, 2018). CTB: cytotrophoblasts, STB:  
816 syncytiotrophoblast, EVT: extravillous trophoblasts, w: weeks.

817

818 **Figure 4. Applying the secretome map of the placenta to data available for human pregnancy**  
819 **complications.**

820 **A)** Venn diagram showing the number of placental proteins in the secretome map that are  
821 differentially expressed in the placenta of women with a pregnancy complication. **B)** FLT1 expression  
822 at the maternal–fetal interface of early human pregnancy via the CellxGene tool ([https://maternal-](https://maternal-fetal-interface.cellgeni.sanger.ac.uk/)  
823 [fetal-interface.cellgeni.sanger.ac.uk/](https://maternal-fetal-interface.cellgeni.sanger.ac.uk/)). **C)** Serum levels of FLT1, MIF, ANGPT2 and IGF2 in pregnant  
824 women at 12 and 28 weeks of gestation who went on to have normoglycemic (healthy) pregnancies  
825 or developed GDM. Data are expressed as multiple of the median; MoM. **D)** Ratio of the levels of  
826 FLT1 to MIF and ANGPT2 to MIF at week 12 of pregnancy in healthy women and those who went on  
827 to develop GDM. Data are presented as mean  $\pm$  SEM of MoM. Raw data for proteins levels are shown  
828 in supplementary figure 4. Asterisks denote statistical significance to the GDM pregnancies, using two  
829 way-ANOVA for C and t-test for D, \*P<0.05, \*\*P<0.01, n=10-11 for healthy pregnancies, n=6 for GDM.  
830 GDM: gestational diabetes mellitus, IUGR: intrauterine growth restriction, LGA: large for gestational  
831 age, PE: preeclampsia, SGA small for gestational age.

832

833 **Figure 5. Transcription factors disregulated in pregnancy complications identified as possible**  
834 **regulators of genes encoding secreted placental proteins.**

835 **A)** Table showing the ten transcription factors with altered expression in pregnancy complications and  
836 with binding sites enriched at the promoters of genes encoding proteins in the placental secretome  
837 map. **B)** Regulatory network built with the ten transcription factors listed in panel A. The ten  
838 transcription factors and their targets that are differentially expressed in pregnancy complications are  
839 highlighted in purple. Location of the target proteins is according to their main cellular/extracellular  
840 compartment indicated by IPA. The graph was generated using BioRender.

841

842 **Supplementary figures and tables**

843 **Figure S1: Placental enrichment expression of non-secreted proteins detected from sorted Jz cells.**

844 **Figure S2: Analysis of the 31 secreted proteins in the placental secretome map reported to be**  
845 **expressed by the mouse but not human placenta.** **A)** The expression of the 28 out of the 31 mouse-  
846 specific secreted placental proteins that were enriched (>10-fold) in the placenta compared to other  
847 tissues using TissueEnrich. **B)** Gene ontology (GO) analysis for the 31 mouse-specific secreted placental  
848 proteins using STRING V.11.

849

850 **Figure S3: Expression of ANGPT2, MIF and IGF2 at the maternal-fetal interface in early human**  
851 **pregnancy.** A-C) ANGPT2, MIF and IGF2 expression at the maternal–fetal interface of early human  
852 pregnancy via the CellxGene tool (<https://maternal-fetal-interface.cellgeni.sanger.ac.uk/>).

853

854 **Figure S4: Concentrations of placenta proteins in human pregnancy samples.** A-D) sFLT1, MIF,  
855 ANGPT2 and IGF2 concentrations in healthy and GDM pregnancies at week 12 and 28 of gestation.  
856 Data are from n=6-10 pregnancies and shown as mean  $\pm$  SEM. Asterisks denote statistical significance  
857 between week of pregnancy, using Two-way ANOVA and \*\*\*\* P<0.001 (there was no significant  
858 difference between control and GDM).

859

860 **Table S1: Gene ontology and protein domain analysis for non-secreted proteins detected in sorted**  
861 **mouse placental endocrine cells (Jz +Tpbpa sorted cells).** A) Gene ontology performed by Panther  
862 analysis, B) Gene ontology performed using Reactome pathways performed by STRING V.11.

863

864 **Table S2: Placental secreted proteins differentially altered in human pregnancy complications.** A)  
865 Gene ontology by Reactome analysis for the 18 secreted proteins specifically altered in GDM  
866 pregnancies. B) Gene ontology by Reactome analysis for the 47 secreted proteins specifically altered  
867 in PE pregnancies. C) Gene ontology by Reactome analysis for 7 secreted proteins specifically altered  
868 in IUGR pregnancies.

869

870 **Table S3: Putative transcription factors (TFs) regulating the endocrine function of the placenta.** The  
871 33 TFs regulating the expression of genes encoding proteins in the placental secretome map. The  
872 target genes differentially expressed in the placenta in pregnancy complications are indicated.

873

## 874 **References**

- 875 1 Napso, T., Yong, H. E. J., Lopez-Tello, J. & Sferruzzi-Perri, A. N. The Role of Placental  
876 Hormones in Mediating Maternal Adaptations to Support Pregnancy and Lactation. *Front*  
877 *Physiol* **9**, 1091, doi:10.3389/fphys.2018.01091 (2018).
- 878 2 Barker, D. J. The fetal and infant origins of disease. *Eur J Clin Invest* **25**, 457-463,  
879 doi:10.1111/j.1365-2362.1995.tb01730.x (1995).
- 880 3 Dugoff, L. *et al.* First-trimester maternal serum PAPP-A and free-beta subunit human  
881 chorionic gonadotropin concentrations and nuchal translucency are associated with  
882 obstetric complications: a population-based screening study (the FASTER Trial). *Am J Obstet*  
883 *Gynecol* **191**, 1446-1451, doi:10.1016/j.ajog.2004.06.052 (2004).
- 884 4 Gaccioli, F., Aye, I., Sovio, U., Charnock-Jones, D. S. & Smith, G. C. S. Screening for fetal  
885 growth restriction using fetal biometry combined with maternal biomarkers. *Am J Obstet*  
886 *Gynecol* **218**, S725-S737, doi:10.1016/j.ajog.2017.12.002 (2018).
- 887 5 Zeisler, H. *et al.* Predictive Value of the sFlt-1:PlGF Ratio in Women with Suspected  
888 Preeclampsia. *N Engl J Med* **374**, 13-22, doi:10.1056/NEJMoa1414838 (2016).
- 889 6 Sferruzzi-Perri, A. N. *et al.* Placental-specific Igf2 deficiency alters developmental adaptations  
890 to undernutrition in mice. *Endocrinology* **152**, 3202-3212, doi:10.1210/en.2011-0240 (2011).
- 891 7 Banerjee, R. R. Piecing together the puzzle of pancreatic islet adaptation in pregnancy. *Ann N*  
892 *Y Acad Sci* **1411**, 120-139, doi:10.1111/nyas.13552 (2018).

- 893 8 Le, T. N., Elsea, S. H., Romero, R., Chaiworapongsa, T. & Francis, G. L. Prolactin receptor gene  
894 polymorphisms are associated with gestational diabetes. *Genet Test Mol Biomarkers* **17**,  
895 567-571, doi:10.1089/gtmb.2013.0009 (2013).
- 896 9 Su, R. *et al.* Alteration in Expression and Methylation of IGF2/H19 in Placenta and Umbilical  
897 Cord Blood Are Associated with Macrosomia Exposed to Intrauterine Hyperglycemia. *PLoS*  
898 *One* **11**, e0148399, doi:10.1371/journal.pone.0148399 (2016).
- 899 10 Nagalla, S. R. *et al.* Maternal serum biomarkers for risk assessment in gestational diabetes. A  
900 potential universal screening test to predict GDM status. *Indian J Endocrinol Metab* **19**, 155-  
901 159, doi:10.4103/2230-8210.140226 (2015).
- 902 11 Bowen, J. M., Chamley, L., Mitchell, M. D. & Keelan, J. A. Cytokines of the placenta and extra-  
903 placental membranes: biosynthesis, secretion and roles in establishment of pregnancy in  
904 women. *Placenta* **23**, 239-256, doi:10.1053/plac.2001.0781 (2002).
- 905 12 Tannetta, D., Masliukaite, I., Vatish, M., Redman, C. & Sargent, I. Update of  
906 syncytiotrophoblast derived extracellular vesicles in normal pregnancy and preeclampsia. *J*  
907 *Reprod Immunol* **119**, 98-106, doi:10.1016/j.jri.2016.08.008 (2017).
- 908 13 O'Sullivan, K. P. *et al.* Evidence of proteinuria, but no other characteristics of pre-eclampsia,  
909 in relaxin-deficient mice. *Reprod Fertil Dev* **29**, 1477-1485, doi:10.1071/RD16056 (2017).
- 910 14 Schumacher, A. *et al.* Human chorionic gonadotropin as a central regulator of pregnancy  
911 immune tolerance. *J Immunol* **190**, 2650-2658, doi:10.4049/jimmunol.1202698 (2013).
- 912 15 Li, H. *et al.* LIFR increases the release of soluble endoglin via the upregulation of MMP14  
913 expression in preeclampsia. *Reproduction* **155**, 297-306, doi:10.1530/REP-17-0732 (2018).
- 914 16 Lin, R. *et al.* Association of maternal and fetal LEPR common variants with maternal glycemic  
915 traits during pregnancy. *Sci Rep* **7**, 3112, doi:10.1038/s41598-017-03518-x (2017).
- 916 17 Hong, S. H. *et al.* Expression of steroidogenic enzymes in human placenta according to the  
917 gestational age. *Mol Med Rep* **19**, 3903-3911, doi:10.3892/mmr.2019.10048 (2019).
- 918 18 Kaitu'u-Lino, T. J. *et al.* Circulating SPINT1 is a biomarker of pregnancies with poor placental  
919 function and fetal growth restriction. *Nat Commun* **11**, 2411, doi:10.1038/s41467-020-  
920 16346-x (2020).
- 921 19 Armstrong, D. L. *et al.* The core transcriptome of mammalian placentas and the divergence  
922 of expression with placental shape. *Placenta* **57**, 71-78, doi:10.1016/j.placenta.2017.04.015  
923 (2017).
- 924 20 Knox, K. & Baker, J. C. Genomic evolution of the placenta using co-option and duplication  
925 and divergence. *Genome Res* **18**, 695-705, doi:10.1101/gr.071407.107 (2008).
- 926 21 Sitras, V., Fenton, C., Paulssen, R., Vartun, A. & Acharya, G. Differences in gene expression  
927 between first and third trimester human placenta: a microarray study. *PLoS One* **7**, e33294,  
928 doi:10.1371/journal.pone.0033294 (2012).
- 929 22 Leavey, K., Bainbridge, S. A. & Cox, B. J. Large scale aggregate microarray analysis reveals  
930 three distinct molecular subclasses of human preeclampsia. *PLoS One* **10**, e0116508,  
931 doi:10.1371/journal.pone.0116508 (2015).
- 932 23 Liu, Y., Beyer, A. & Aebersold, R. On the Dependency of Cellular Protein Levels on mRNA  
933 Abundance. *Cell* **165**, 535-550, doi:10.1016/j.cell.2016.03.014 (2016).
- 934 24 Simmons, D. G., Fortier, A. L. & Cross, J. C. Diverse subtypes and developmental origins of  
935 trophoblast giant cells in the mouse placenta. *Dev Biol* **304**, 567-578,  
936 doi:10.1016/j.ydbio.2007.01.009 (2007).
- 937 25 Cox, B. *et al.* Translational analysis of mouse and human placental protein and mRNA reveals  
938 distinct molecular pathologies in human preeclampsia. *Mol Cell Proteomics* **10**, M111  
939 012526, doi:10.1074/mcp.M111.012526 (2011).
- 940 26 Soncin, F. *et al.* Comparative analysis of mouse and human placentae across gestation  
941 reveals species-specific regulators of placental development. *Development* **145**,  
942 doi:10.1242/dev.156273 (2018).



- 943 27 Nielsen, H., Tsigirgos, K. D., Brunak, S. & von Heijne, G. A Brief History of Protein Sorting  
944 Prediction. *Protein J* **38**, 200-216, doi:10.1007/s10930-019-09838-3 (2019).
- 945 28 Grimmond, S. M. *et al.* The mouse secretome: functional classification of the proteins  
946 secreted into the extracellular environment. *Genome Res* **13**, 1350-1359,  
947 doi:10.1101/gr.983703 (2003).
- 948 29 Kim, J., Gee, H. Y. & Lee, M. G. Unconventional protein secretion - new insights into the  
949 pathogenesis and therapeutic targets of human diseases. *J Cell Sci* **131**,  
950 doi:10.1242/jcs.213686 (2018).
- 951 30 Muzumdar, M. D., Tasic, B., Miyamichi, K., Li, L. & Luo, L. A global double-fluorescent Cre  
952 reporter mouse. *Genesis* **45**, 593-605, doi:10.1002/dvg.20335 (2007).
- 953 31 Liu, Y. *et al.* Single-cell RNA-seq reveals the diversity of trophoblast subtypes and patterns of  
954 differentiation in the human placenta. *Cell Res* **28**, 819-832, doi:10.1038/s41422-018-0066-y  
955 (2018).
- 956 32 Turco, M. Y. *et al.* Trophoblast organoids as a model for maternal-fetal interactions during  
957 human placentation. *Nature* **564**, 263-267, doi:10.1038/s41586-018-0753-3 (2018).
- 958 33 Vento-Tormo, R. *et al.* Single-cell reconstruction of the early maternal-fetal interface in  
959 humans. *Nature* **563**, 347-353, doi:10.1038/s41586-018-0698-6 (2018).
- 960 34 Henke, C. *et al.* Regulation of murine placentogenesis by the retroviral genes Syncytin-A,  
961 Syncytin-B and Peg10. *Differentiation* **85**, 150-160, doi:10.1016/j.diff.2013.02.002 (2013).
- 962 35 Pennington, K. A., Schlitt, J. M. & Schulz, L. C. Isolation of primary mouse trophoblast cells  
963 and trophoblast invasion assay. *J Vis Exp*, e3202, doi:10.3791/3202 (2012).
- 964 36 Thordarson, G., Folger, P. & Talamantes, F. Development of a placental cell culture system  
965 for studying the control of mouse placental lactogen II secretion. *Placenta* **8**, 573-585,  
966 doi:10.1016/0143-4004(87)90028-2 (1987).
- 967 37 Chevallet, M., Diemer, H., Van Dorsselaar, A., Villiers, C. & Rabilloud, T. Toward a better  
968 analysis of secreted proteins: the example of the myeloid cells secretome. *Proteomics* **7**,  
969 1757-1770, doi:10.1002/pmic.200601024 (2007).
- 970 38 Angel, T. E. *et al.* Mass spectrometry-based proteomics: existing capabilities and future  
971 directions. *Chem Soc Rev* **41**, 3912-3928, doi:10.1039/c2cs15331a (2012).
- 972 39 Aykroyd, B. R. L., Tunster, S. J. & Sferruzzi-Perri, A. N. Igf2 deletion alters mouse placenta  
973 endocrine capacity in a sexually dimorphic manner. *J Endocrinol* **246**, 93-108,  
974 doi:10.1530/JOE-20-0128 (2020).
- 975 40 Sferruzzi-Perri, A. N., Sandovici, I., Constancia, M. & Fowden, A. L. Placental phenotype and  
976 the insulin-like growth factors: resource allocation to fetal growth. *J Physiol* **595**, 5057-5093,  
977 doi:10.1113/JP273330 (2017).
- 978 41 Amash, A., Holcberg, G., Sapir, O. & Huleihel, M. Placental secretion of interleukin-1 and  
979 interleukin-1 receptor antagonist in preeclampsia: effect of magnesium sulfate. *J Interferon*  
980 *Cytokine Res* **32**, 432-441, doi:10.1089/jir.2012.0013 (2012).
- 981 42 Denley, A., Cosgrove, L. J., Booker, G. W., Wallace, J. C. & Forbes, B. E. Molecular interactions  
982 of the IGF system. *Cytokine Growth Factor Rev* **16**, 421-439,  
983 doi:10.1016/j.cytogfr.2005.04.004 (2005).
- 984 43 Ding, R. *et al.* Altered Matrix Metalloproteinases Expression in Placenta from Patients with  
985 Gestational Diabetes Mellitus. *Chin Med J (Engl)* **131**, 1255-1258, doi:10.4103/0366-  
986 6999.231530 (2018).
- 987 44 Melhem, H. *et al.* Placental secretion of apolipoprotein A1 and E: the anti-atherogenic  
988 impact of the placenta. *Sci Rep* **9**, 6225, doi:10.1038/s41598-019-42522-1 (2019).
- 989 45 Rogenhofer, N. *et al.* Assessment of M2/ANXA5 haplotype as a risk factor in couples with  
990 placenta-mediated pregnancy complications. *J Assist Reprod Genet* **35**, 157-163,  
991 doi:10.1007/s10815-017-1041-0 (2018).
- 992 46 Petraglia, F. Inhibin, activin and follistatin in the human placenta--a new family of regulatory  
993 proteins. *Placenta* **18**, 3-8, doi:10.1016/s0143-4004(97)90065-5 (1997).

- 994 47 Landers, K. A., Mortimer, R. H. & Richard, K. Transthyretin and the human placenta. *Placenta*  
995 **34**, 513-517, doi:10.1016/j.placenta.2013.04.013 (2013).
- 996 48 Salzet, M., Vieau, D. & Stefano, G. B. Serpins: an evolutionarily conserved survival strategy.  
997 *Immunol Today* **20**, 541-544, doi:10.1016/s0167-5699(99)01495-4 (1999).
- 998 49 Harris, R. C., Chung, E. & Coffey, R. J. EGF receptor ligands. *Exp Cell Res* **284**, 2-13,  
999 doi:10.1016/s0014-4827(02)00105-2 (2003).
- 1000 50 Mason, R. W. Emerging functions of placental cathepsins. *Placenta* **29**, 385-390,  
1001 doi:10.1016/j.placenta.2008.02.006 (2008).
- 1002 51 Simmons, D. G., Rawn, S., Davies, A., Hughes, M. & Cross, J. C. Spatial and temporal  
1003 expression of the 23 murine Prolactin/Placental Lactogen-related genes is not associated  
1004 with their position in the locus. *BMC Genomics* **9**, 352, doi:10.1186/1471-2164-9-352 (2008).
- 1005 52 Soares, M. J. The prolactin and growth hormone families: pregnancy-specific  
1006 hormones/cytokines at the maternal-fetal interface. *Reprod Biol Endocrinol* **2**, 51,  
1007 doi:10.1186/1477-7827-2-51 (2004).
- 1008 53 Govender, N., Moodley, J. & Naicker, T. The Use of Soluble FMS-like Tyrosine Kinase  
1009 1/Placental Growth Factor Ratio in the Clinical Management of Pre-eclampsia. *Afr J Reprod*  
1010 *Health* **22**, 135-143, doi:10.29063/ajrh2018/v22i1.14 (2018).
- 1011 54 Birdir, C. *et al.* Predictive value of sFlt-1, PlGF, sFlt-1/PlGF ratio and PAPP-A for late-onset  
1012 preeclampsia and IUGR between 32 and 37 weeks of pregnancy. *Pregnancy Hypertens* **12**,  
1013 124-128, doi:10.1016/j.preghy.2018.04.010 (2018).
- 1014 55 Troncoso, F. *et al.* Gestational diabetes mellitus is associated with increased pro-migratory  
1015 activation of vascular endothelial growth factor receptor 2 and reduced expression of  
1016 vascular endothelial growth factor receptor 1. *PLoS One* **12**, e0182509,  
1017 doi:10.1371/journal.pone.0182509 (2017).
- 1018 56 Bourque, D. K., Avila, L., Penaherrera, M., von Dadelszen, P. & Robinson, W. P. Decreased  
1019 placental methylation at the H19/IGF2 imprinting control region is associated with  
1020 normotensive intrauterine growth restriction but not preeclampsia. *Placenta* **31**, 197-202,  
1021 doi:10.1016/j.placenta.2009.12.003 (2010).
- 1022 57 Nawathe, A. R. *et al.* Insulin-like growth factor axis in pregnancies affected by fetal growth  
1023 disorders. *Clin Epigenetics* **8**, 11, doi:10.1186/s13148-016-0178-5 (2016).
- 1024 58 Tran, N. T. *et al.* Maternal citrulline supplementation enhances placental function and fetal  
1025 growth in a rat model of IUGR: involvement of insulin-like growth factor 2 and angiogenic  
1026 factors. *J Matern Fetal Neonatal Med* **30**, 1906-1911, doi:10.1080/14767058.2016.1229768  
1027 (2017).
- 1028 59 Kappil, M. A. *et al.* Placental expression profile of imprinted genes impacts birth weight.  
1029 *Epigenetics* **10**, 842-849, doi:10.1080/15592294.2015.1073881 (2015).
- 1030 60 Machado, J. S. R. *et al.* Role of plasma PlGF, PDGF-AA, ANG-1, ANG-2, and the ANG-1/ANG-2  
1031 ratio as predictors of preeclampsia in a cohort of pregnant women. *Pregnancy Hypertens* **16**,  
1032 105-111, doi:10.1016/j.preghy.2019.03.011 (2019).
- 1033 61 Loegl, J. *et al.* GDM alters paracrine regulation of feto-placental angiogenesis via the  
1034 trophoblast. *Lab Invest* **97**, 409-418, doi:10.1038/labinvest.2016.149 (2017).
- 1035 62 Chui, A. *et al.* Expression of Biglycan in First Trimester Chorionic Villous Sampling Placental  
1036 Samples and Altered Function in Telomerase-Immortalized Microvascular Endothelial Cells.  
1037 *Arterioscler Thromb Vasc Biol* **37**, 1168-1179, doi:10.1161/ATVBAHA.117.309422 (2017).
- 1038 63 Wang, Y., Tasevski, V., Wallace, E. M., Gallery, E. D. & Morris, J. M. Reduced maternal serum  
1039 concentrations of angiopoietin-2 in the first trimester precede intrauterine growth  
1040 restriction associated with placental insufficiency. *Bjog* **114**, 1427-1431, doi:10.1111/j.1471-  
1041 0528.2007.01511.x (2007).
- 1042 64 Rambaldi, M. P., Weiner, E., Mecacci, F., Bar, J. & Petraglia, F. Immunomodulation and  
1043 preeclampsia. *Best Pract Res Clin Obstet Gynaecol* **60**, 87-96,  
1044 doi:10.1016/j.bpobgyn.2019.06.005 (2019).

- 1045 65 Leavey, K. *et al.* Unsupervised Placental Gene Expression Profiling Identifies Clinically  
1046 Relevant Subclasses of Human Preeclampsia. *Hypertension* **68**, 137-147,  
1047 doi:10.1161/HYPERTENSIONAHA.116.07293 (2016).
- 1048 66 Butte, N. F. *et al.* Protein metabolism in insulin-treated gestational diabetes. *Diabetes Care*  
1049 **22**, 806-811, doi:10.2337/diacare.22.5.806 (1999).
- 1050 67 Yung, H. W. *et al.* Placental endoplasmic reticulum stress in gestational diabetes: the  
1051 potential for therapeutic intervention with chemical chaperones and antioxidants.  
1052 *Diabetologia* **59**, 2240-2250, doi:10.1007/s00125-016-4040-2 (2016).
- 1053 68 Walentowicz-Sadlecka, M. *et al.* Assessment of the sFlt-1 and sFlt-1/25(OH)D Ratio as a  
1054 Diagnostic Tool in Gestational Hypertension (GH), Preeclampsia (PE), and Gestational  
1055 Diabetes Mellitus (GDM). *Dis Markers* **2019**, 5870239, doi:10.1155/2019/5870239 (2019).
- 1056 69 Lappas, M. Markers of endothelial cell dysfunction are increased in human omental adipose  
1057 tissue from women with pre-existing maternal obesity and gestational diabetes. *Metabolism*  
1058 **63**, 860-873, doi:10.1016/j.metabol.2014.03.007 (2014).
- 1059 70 Zhao, B., Han, X., Meng, Q. & Luo, Q. Early second trimester maternal serum markers in the  
1060 prediction of gestational diabetes mellitus. *J Diabetes Investig* **9**, 967-974,  
1061 doi:10.1111/jdi.12798 (2018).
- 1062 71 Toso, C., Emamaullee, J. A., Merani, S. & Shapiro, A. M. The role of macrophage migration  
1063 inhibitory factor on glucose metabolism and diabetes. *Diabetologia* **51**, 1937-1946,  
1064 doi:10.1007/s00125-008-1063-3 (2008).
- 1065 72 Stepan, H., Unversucht, A., Wessel, N. & Faber, R. Predictive value of maternal angiogenic  
1066 factors in second trimester pregnancies with abnormal uterine perfusion. *Hypertension* **49**,  
1067 818-824, doi:10.1161/01.HYP.0000258404.21552.a3 (2007).
- 1068 73 Sober, S. *et al.* Extensive shift in placental transcriptome profile in preeclampsia and  
1069 placental origin of adverse pregnancy outcomes. *Sci Rep* **5**, 13336, doi:10.1038/srep13336  
1070 (2015).
- 1071 74 Pringle, K. G., Kind, K. L., Sferruzzi-Perri, A. N., Thompson, J. G. & Roberts, C. T. Beyond  
1072 oxygen: complex regulation and activity of hypoxia inducible factors in pregnancy. *Hum*  
1073 *Reprod Update* **16**, 415-431, doi:10.1093/humupd/dmp046 (2010).
- 1074 75 Than, N. G. *et al.* Integrated Systems Biology Approach Identifies Novel Maternal and  
1075 Placental Pathways of Preeclampsia. *Front Immunol* **9**, 1661, doi:10.3389/fimmu.2018.01661  
1076 (2018).
- 1077 76 Paauw, N. D. *et al.* H3K27 acetylation and gene expression analysis reveals differences in  
1078 placental chromatin activity in fetal growth restriction. *Clin Epigenetics* **10**, 85,  
1079 doi:10.1186/s13148-018-0508-x (2018).
- 1080 77 Voz, M. L., Agten, N. S., Van de Ven, W. J. & Kas, K. PLAG1, the main translocation target in  
1081 pleomorphic adenoma of the salivary glands, is a positive regulator of IGF-II. *Cancer Res* **60**,  
1082 106-113 (2000).
- 1083 78 Akhtar, M. *et al.* Cell type and context-specific function of PLAG1 for IGF2 P3 promoter  
1084 activity. *Int J Oncol* **41**, 1959-1966, doi:10.3892/ijo.2012.1641 (2012).
- 1085 79 Jansson, D. *et al.* Glucose controls CREB activity in islet cells via regulated phosphorylation of  
1086 TORC2. *Proc Natl Acad Sci U S A* **105**, 10161-10166, doi:10.1073/pnas.0800796105 (2008).
- 1087 80 Whitehead, C. L. *et al.* Identifying late-onset fetal growth restriction by measuring circulating  
1088 placental RNA in the maternal blood at 28 weeks' gestation. *Am J Obstet Gynecol* **214**, 521  
1089 e521-521 e528, doi:10.1016/j.ajog.2016.01.191 (2016).
- 1090 81 Lopez-Tello, J. *et al.* Fetal and trophoblast PI3K p110alpha have distinct roles in regulating  
1091 resource supply to the growing fetus in mice. *Elife* **8**, doi:10.7554/eLife.45282 (2019).
- 1092 82 Hensen, K. *et al.* Targeted disruption of the murine Plag1 proto-oncogene causes growth  
1093 retardation and reduced fertility. *Dev Growth Differ* **46**, 459-470, doi:10.1111/j.1440-  
1094 169x.2004.00762.x (2004).

- 1095 83 Zuckermann, F. A. & Head, J. R. Isolation and characterization of trophoblast from murine  
1096 placenta. *Placenta* **7**, 349-364, doi:10.1016/s0143-4004(86)80153-9 (1986).
- 1097 84 Lloyd-Lewis, B. *et al.* Stat3-mediated alterations in lysosomal membrane protein  
1098 composition. *J Biol Chem* **293**, 4244-4261, doi:10.1074/jbc.RA118.001777 (2018).
- 1099 85 Kay, R. G., Galvin, S., Larraufie, P., Reimann, F. & Gribble, F. M. Liquid chromatography/mass  
1100 spectrometry based detection and semi-quantitative analysis of INSL5 in human and murine  
1101 tissues. *Rapid Commun Mass Spectrom* **31**, 1963-1973, doi:10.1002/rcm.7978 (2017).
- 1102 86 Ashburner, M. *et al.* Gene ontology: tool for the unification of biology. The Gene Ontology  
1103 Consortium. *Nat Genet* **25**, 25-29, doi:10.1038/75556 (2000).
- 1104 87 Jain, A. & Tuteja, G. TissueEnrich: Tissue-specific gene enrichment analysis. *Bioinformatics*  
1105 **35**, 1966-1967, doi:10.1093/bioinformatics/bty890 (2019).
- 1106 88 Uhlen, M. *et al.* Proteomics. Tissue-based map of the human proteome. *Science* **347**,  
1107 1260419, doi:10.1126/science.1260419 (2015).
- 1108 89 Consortium, G. T. Human genomics. The Genotype-Tissue Expression (GTEx) pilot analysis:  
1109 multitissue gene regulation in humans. *Science* **348**, 648-660, doi:10.1126/science.1262110  
1110 (2015).
- 1111 90 Shen, Y. *et al.* A map of the cis-regulatory sequences in the mouse genome. *Nature* **488**, 116-  
1112 120, doi:10.1038/nature11243 (2012).
- 1113 91 International Association of, D. *et al.* International association of diabetes and pregnancy  
1114 study groups recommendations on the diagnosis and classification of hyperglycemia in  
1115 pregnancy. *Diabetes Care* **33**, 676-682, doi:10.2337/dc09-1848 (2010).
- 1116 92 Meek, C. *et al.* Approaches to screening for hyperglycaemia in pregnant women during and  
1117 after the Covid-19 pandemic. *Diabetic Medicine*, doi:10.17863/CAM.54385 (2020).
- 1118 93 Mikheev, A. M. *et al.* Profiling gene expression in human placentae of different gestational  
1119 ages: an OPRU Network and UW SCOR Study. *Reprod Sci* **15**, 866-877,  
1120 doi:10.1177/1933719108322425 (2008).
- 1121 94 Uuskula, L. *et al.* Mid-gestational gene expression profile in placenta and link to pregnancy  
1122 complications. *PLoS One* **7**, e49248, doi:10.1371/journal.pone.0049248 (2012).
- 1123 95 Gormley, M. *et al.* Preeclampsia: novel insights from global RNA profiling of trophoblast  
1124 subpopulations. *Am J Obstet Gynecol* **217**, 200 e201-200 e217,  
1125 doi:10.1016/j.ajog.2017.03.017 (2017).
- 1126 96 Enquobahrie, D. A., Williams, M. A., Qiu, C., Meller, M. & Sorensen, T. K. Global placental  
1127 gene expression in gestational diabetes mellitus. *Am J Obstet Gynecol* **200**, 206 e201-213,  
1128 doi:10.1016/j.ajog.2008.08.022 (2009).
- 1129 97 Radaelli, T., Varastehpour, A., Catalano, P. & Hauguel-de Mouzon, S. Gestational diabetes  
1130 induces placental genes for chronic stress and inflammatory pathways. *Diabetes* **52**, 2951-  
1131 2958 (2003).
- 1132 98 Bari, M. F., Ngo, S., Bastie, C. C., Sheppard, A. M. & Vatish, M. Gestational diabetic  
1133 transcriptomic profiling of microdissected human trophoblast. *J Endocrinol* **229**, 47-59,  
1134 doi:10.1530/JOE-15-0424 (2016).
- 1135 99 Ravensborg, T. *et al.* First-trimester proteomic profiling identifies novel predictors of  
1136 gestational diabetes mellitus. *PLoS One* **14**, e0214457, doi:10.1371/journal.pone.0214457  
1137 (2019).
- 1138 100 Majewska, M. *et al.* Placenta Transcriptome Profiling in Intrauterine Growth Restriction  
1139 (IUGR). *Int J Mol Sci* **20**, doi:10.3390/ijms20061510 (2019).

1140

1141

Figure 1.

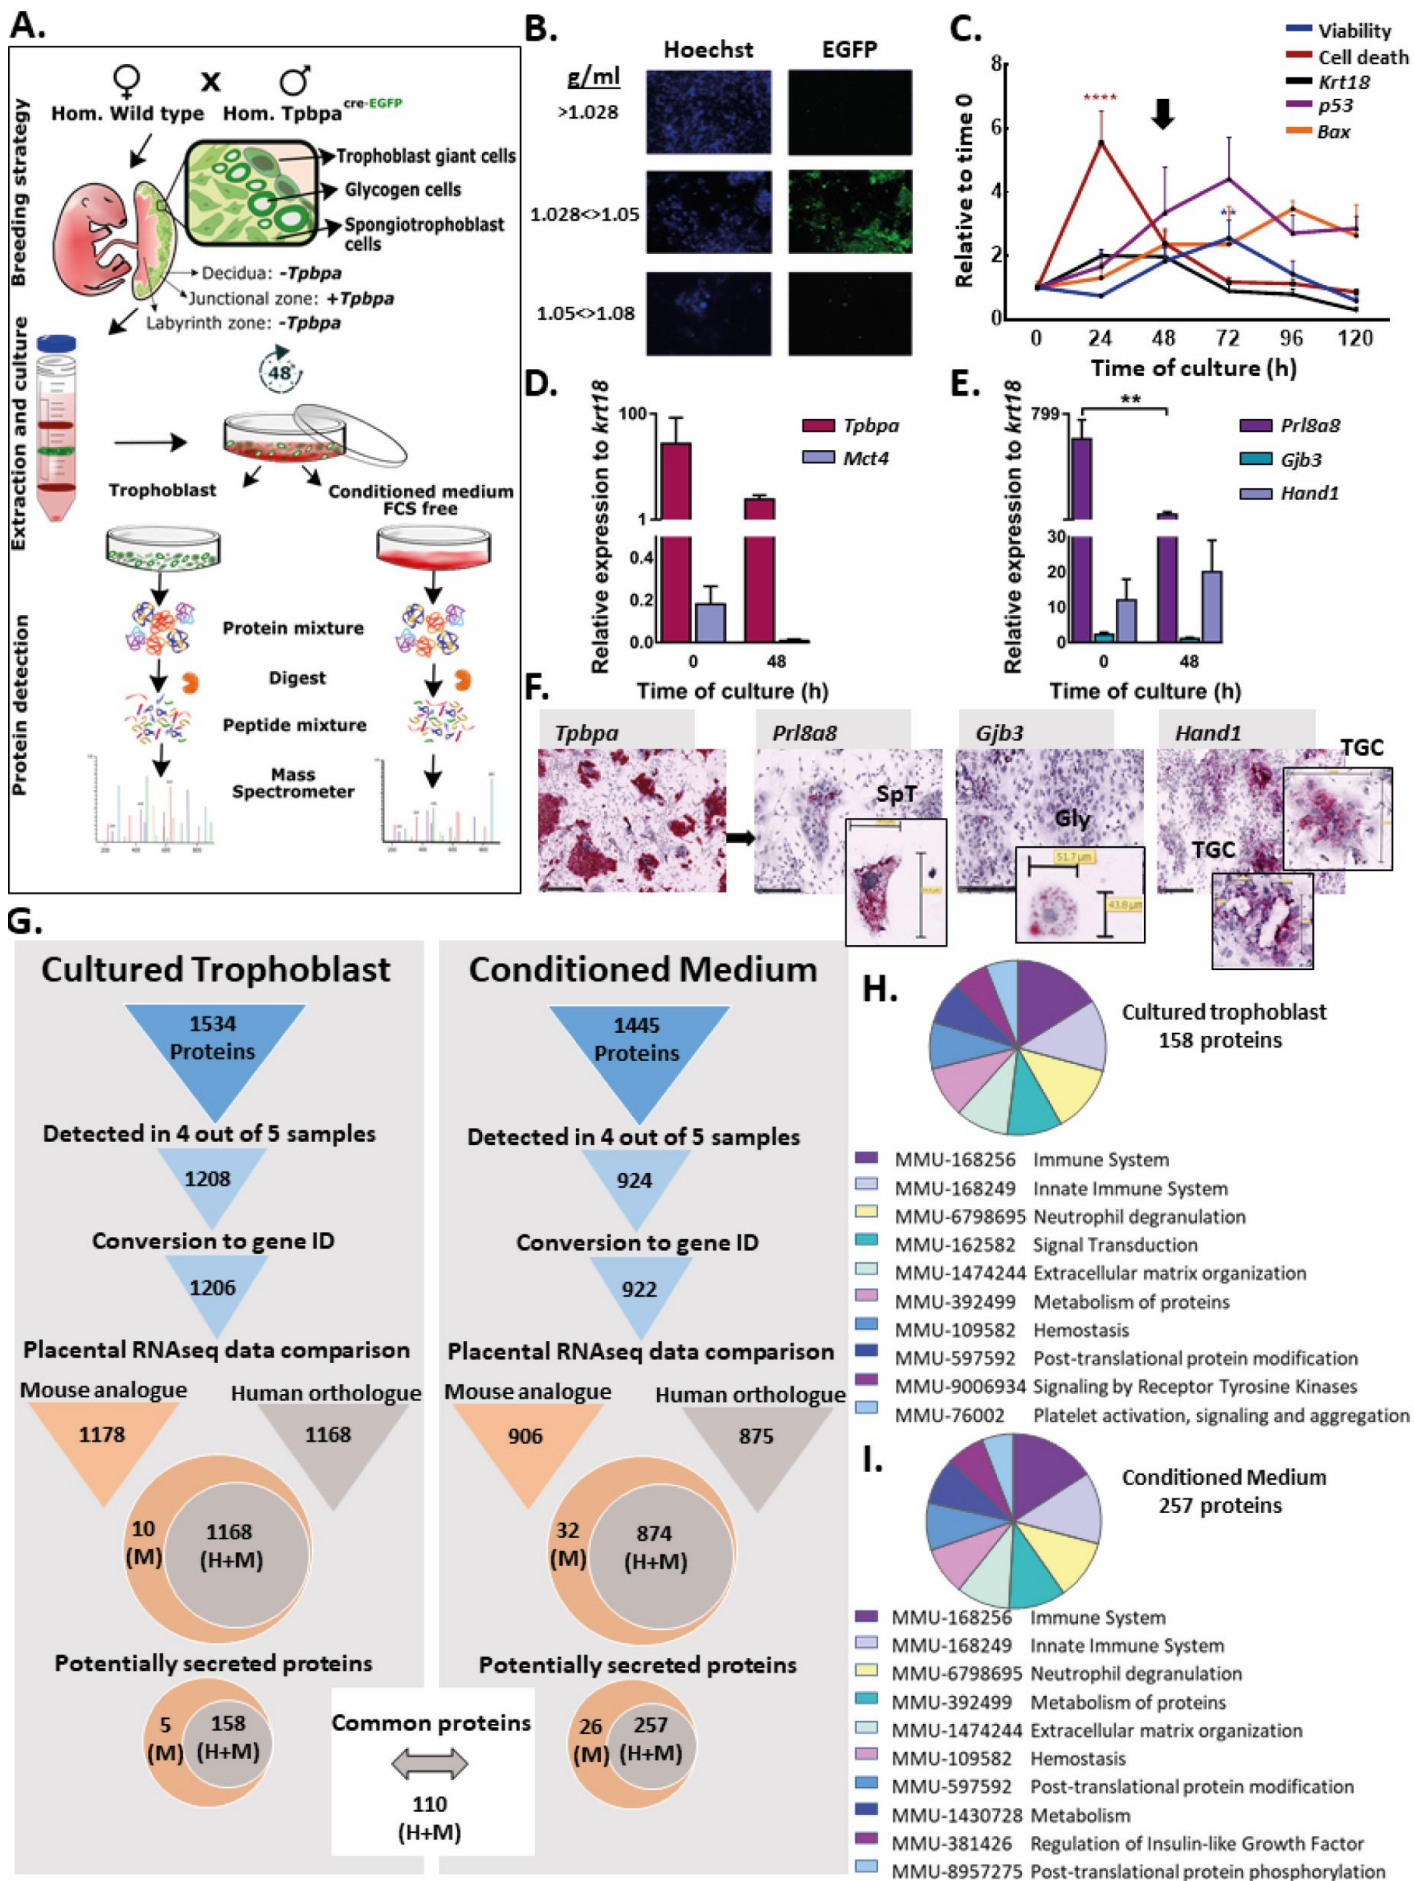

Figure 2.

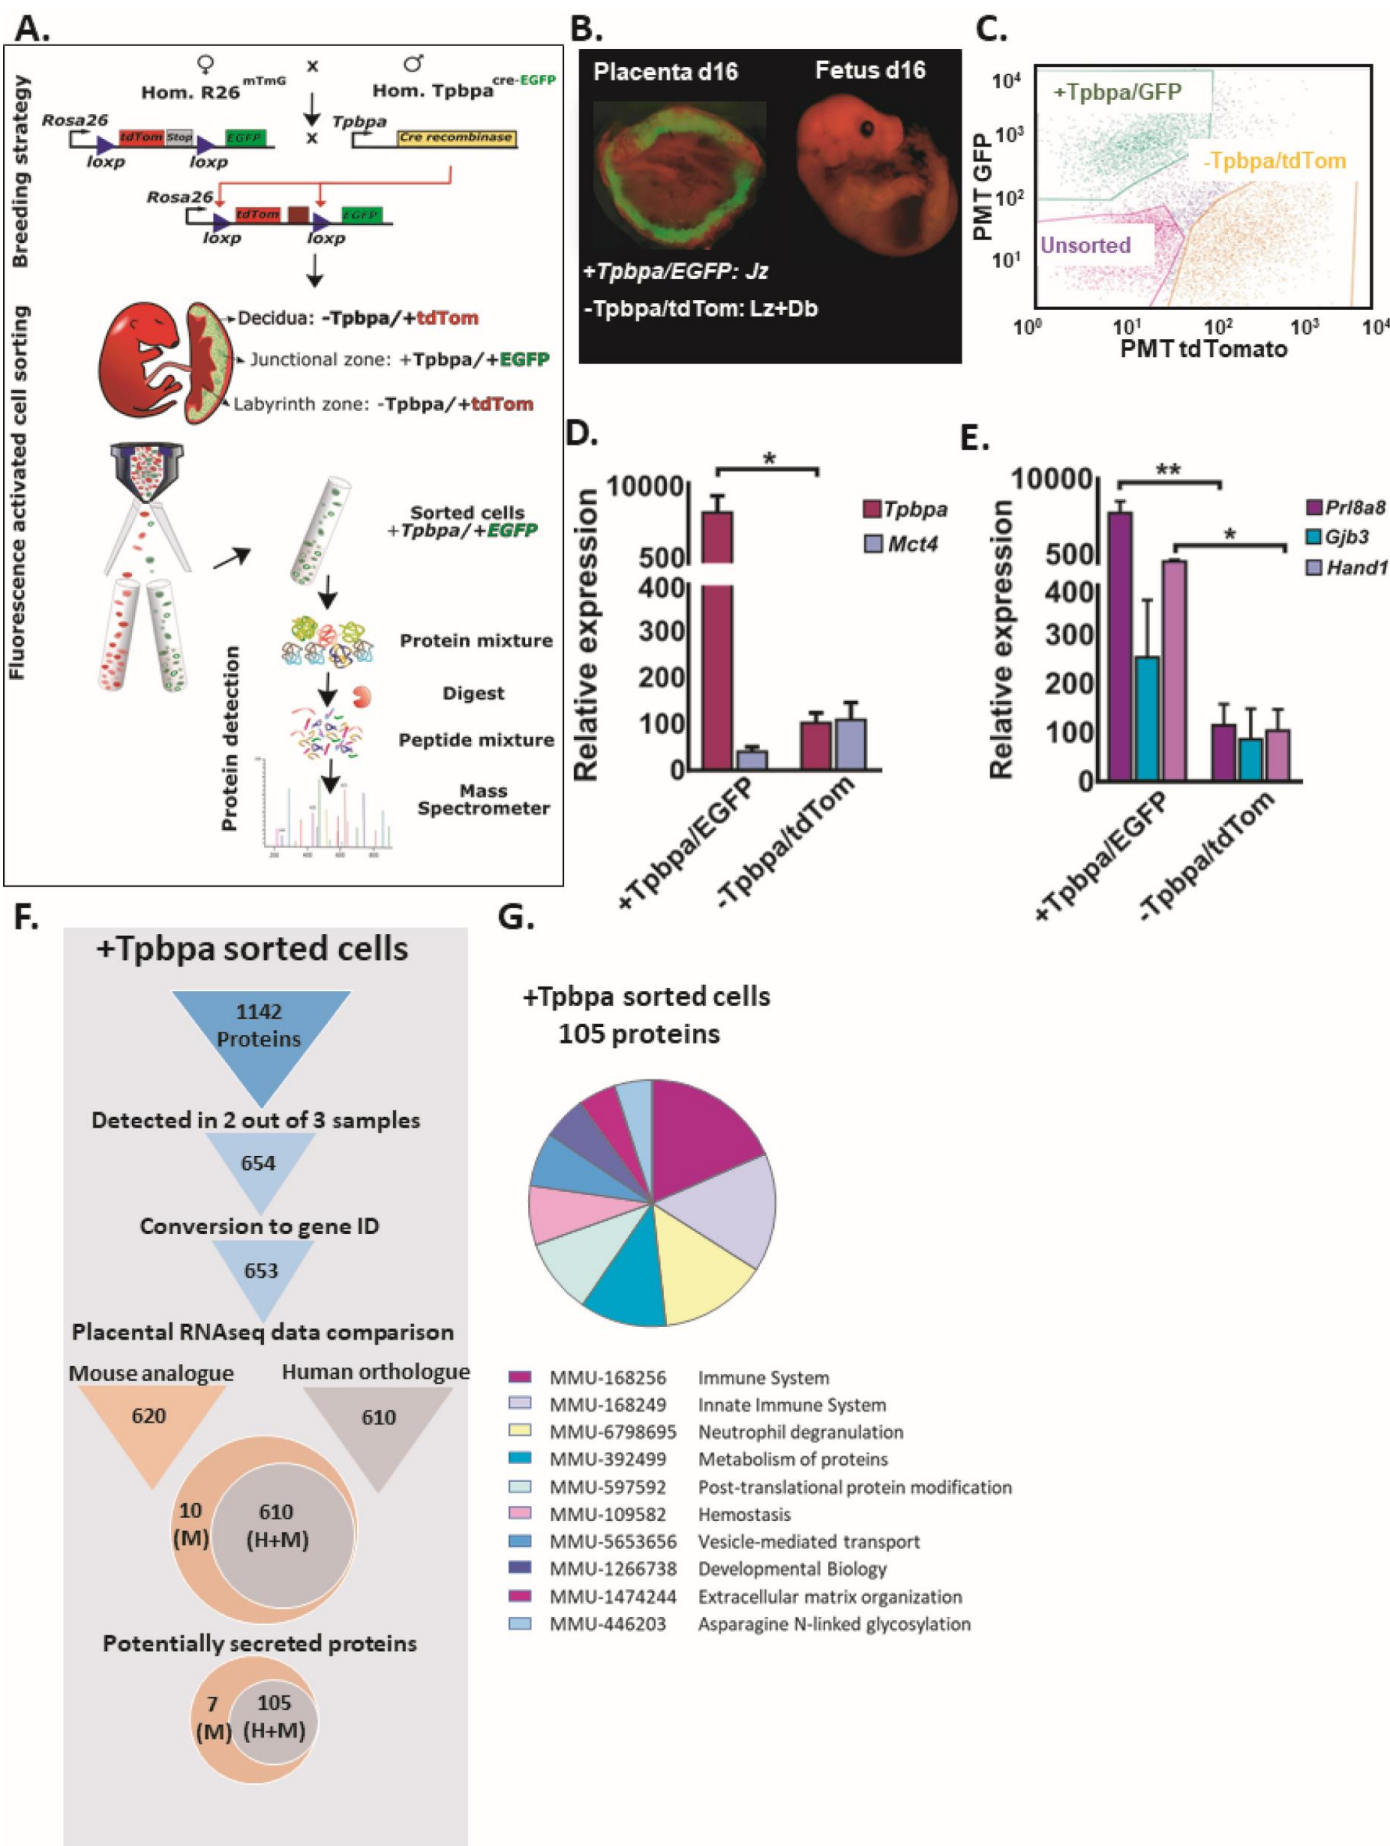

Figure 3.

**A. Placental secretome map**

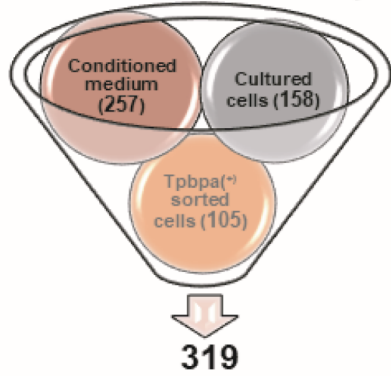

Potential secreted protein from the placenta

**B.**

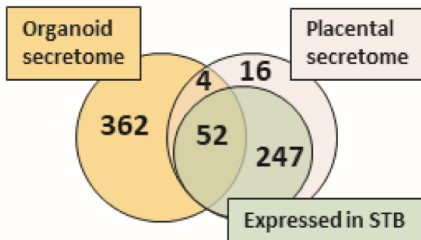

**C. Biological Process**

| #Term ID   | Term description                               | # obs. | FDR      |
|------------|------------------------------------------------|--------|----------|
| GO:0050896 | Response to stimulus                           | 204    | 2.44E-31 |
| GO:0051239 | Regulation of multicellular organismal process | 128    | 1.46E-29 |
| GO:0065008 | Regulation of biological quality               | 138    | 3.54E-28 |
| GO:0006950 | Response to stress                             | 126    | 5.19E-28 |
| GO:0032501 | Multicellular organismal process               | 181    | 6.5E-26  |
| GO:0050793 | Regulation of developmental process            | 110    | 5.53E-24 |
| GO:0048519 | Negative regulation of biological process      | 157    | 7.33E-24 |

**Molecular Function**

| #Term ID   | Term description                   | # obs. | FDR      |
|------------|------------------------------------|--------|----------|
| GO:0005515 | Protein binding                    | 199    | 9.02E-31 |
| GO:0005488 | Binding                            | 258    | 5.2E-28  |
| GO:0005102 | Signaling receptor binding         | 85     | 1.31E-24 |
| GO:0044877 | Protein-containing complex binding | 61     | 8.93E-17 |
| GO:0005509 | Calcium ion binding                | 44     | 6.79E-16 |
| GO:0050840 | Extracellular matrix binding       | 18     | 1.66E-15 |
| GO:0002020 | Protease binding                   | 24     | 2.04E-15 |

**Protein Domains**

| #Term ID  | Term description                           | # obs. | FDR      |
|-----------|--------------------------------------------|--------|----------|
| IPR023795 | Serpin, conserved site                     | 13     | 3.04E-09 |
| IPR000742 | EGF-like domain                            | 22     | 5.60E-09 |
| IPR008160 | Collagen triple helix repeat               | 14     | 7.34E-09 |
| IPR000215 | Serpin family                              | 13     | 1.11E-08 |
| IPR009030 | Growth factor receptor cysteine            | 16     | 1.57E-08 |
| IPR001464 | Annexin                                    | 7      | 2.37E-07 |
| IPR000867 | Insulin-like growth factor-binding protein | 7      | 3.88E-06 |

**D.**

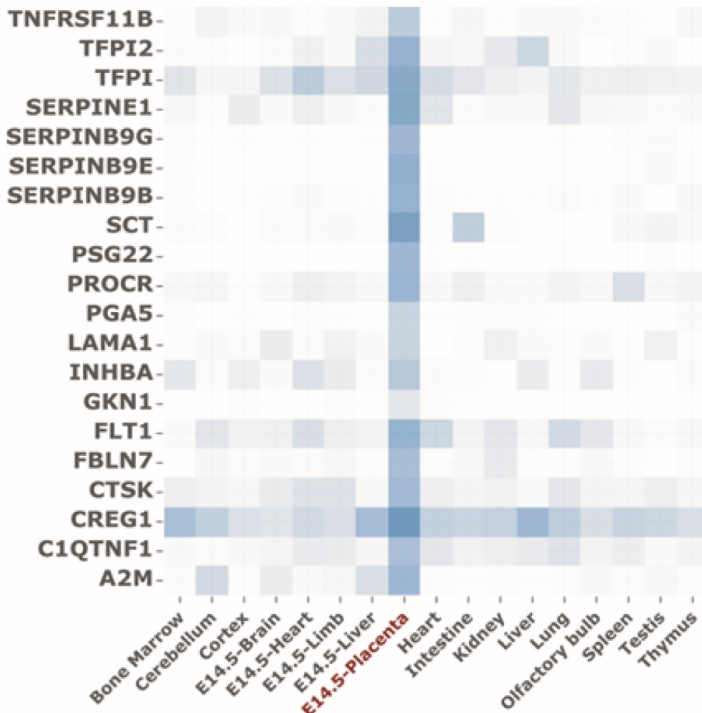

**E.**

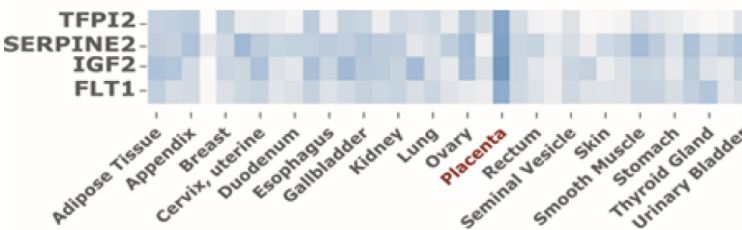

**F.**

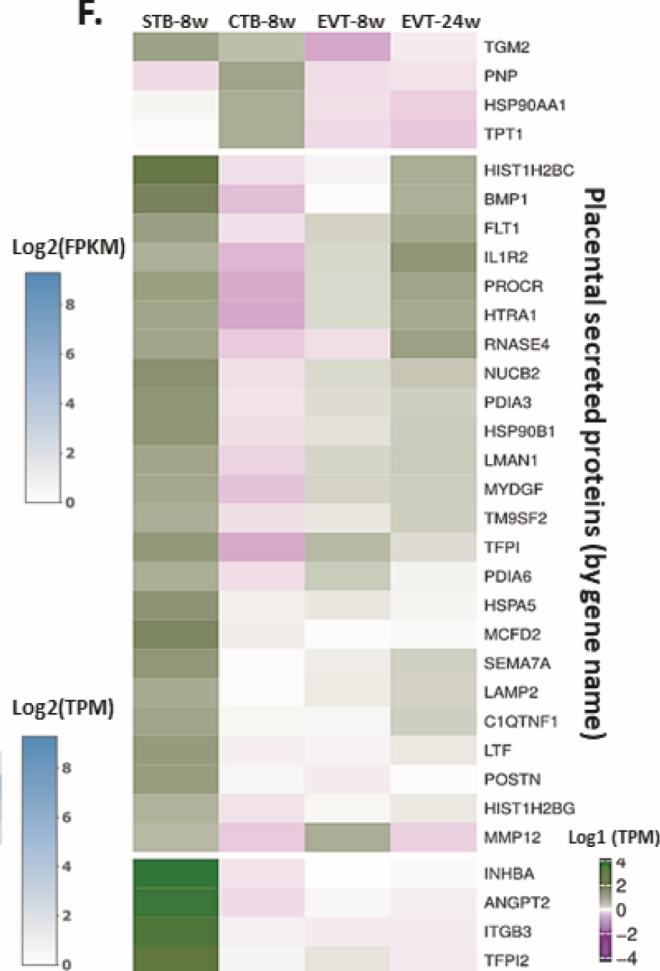

Figure 4.

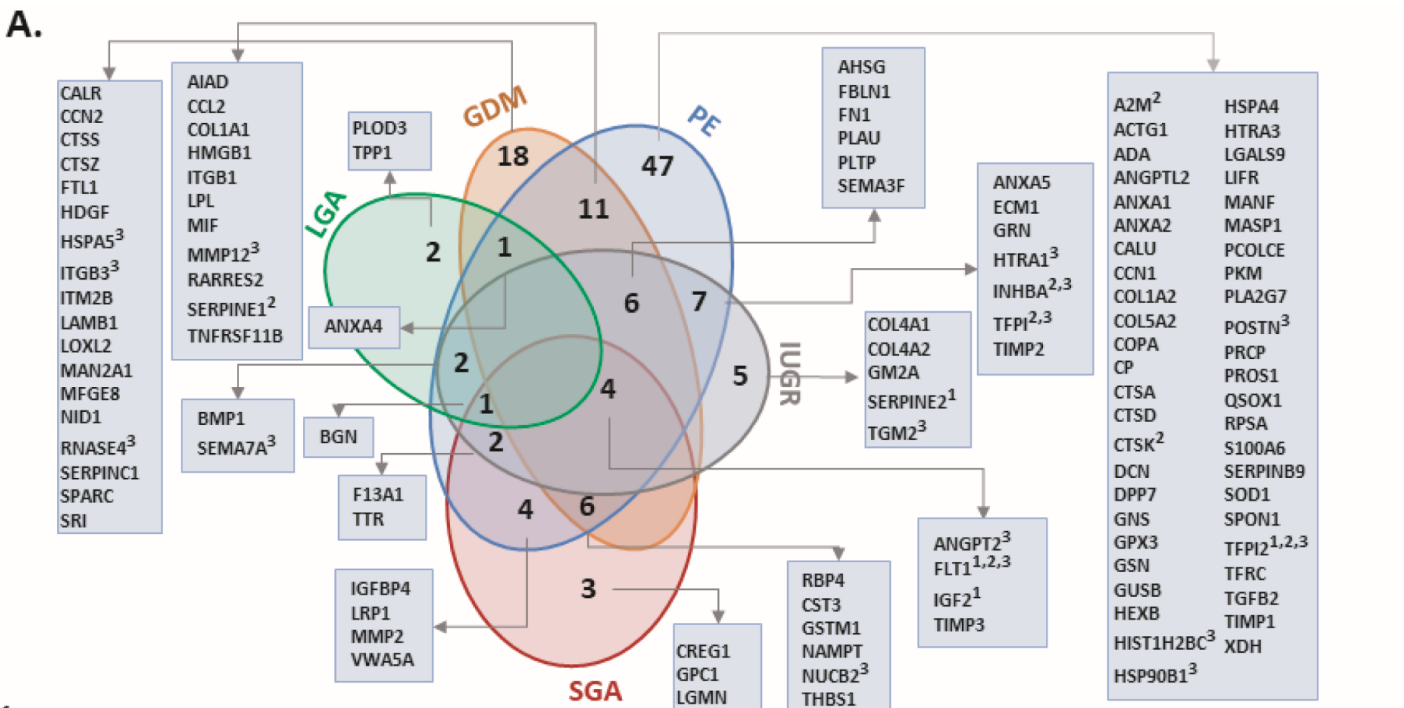

<sup>1</sup> Enriched 10-fold in the human placenta versus other tissues.  
<sup>2</sup> Enriched 10-fold in the mouse placenta versus other tissues.  
<sup>3</sup> Highly expressed in human Syncytiotrophoblast.

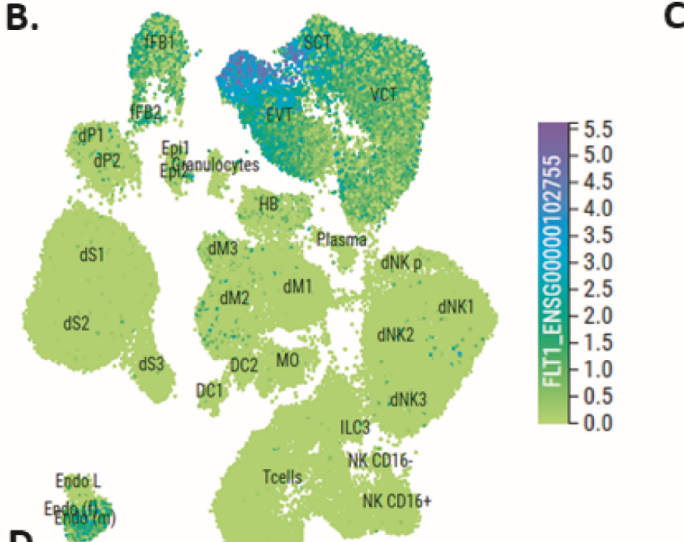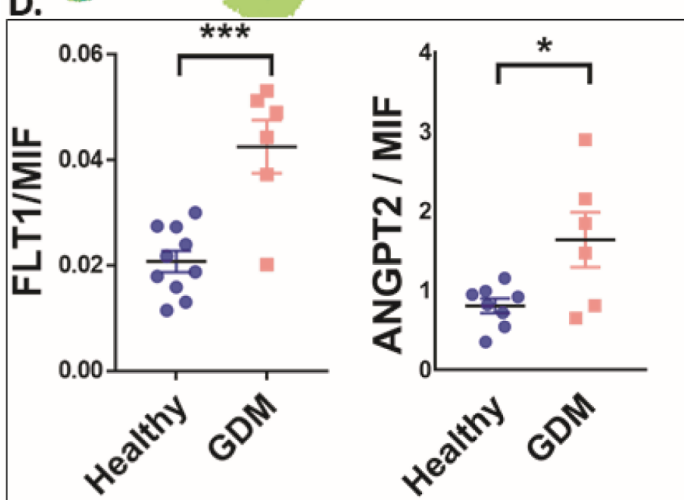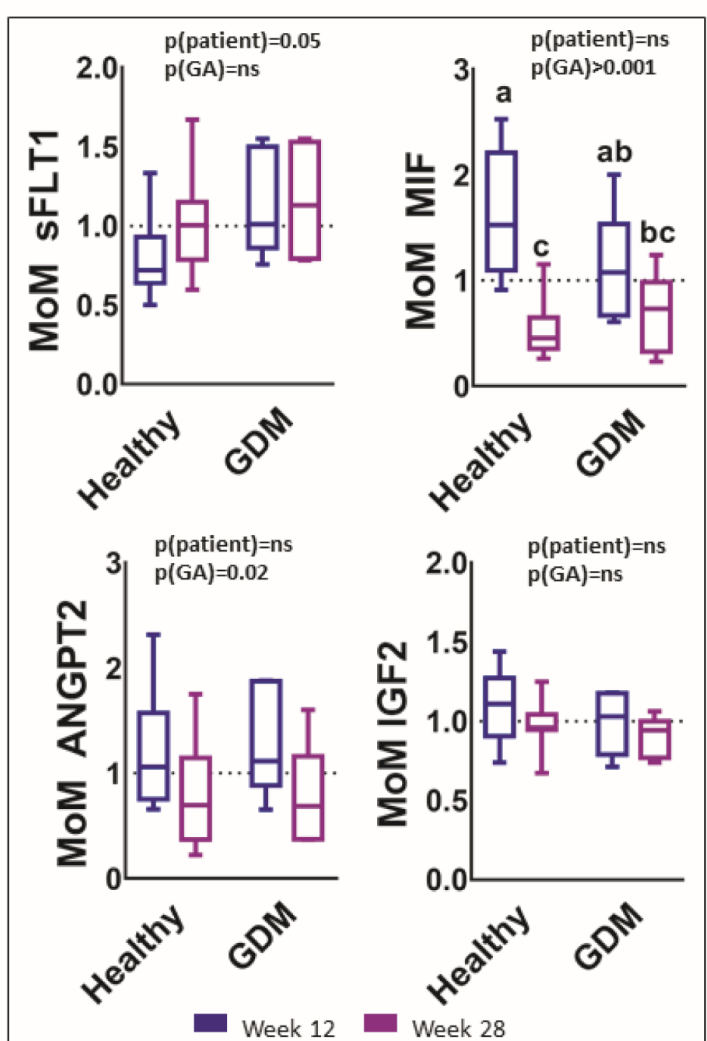



Figure 5.

A.

| TF    | Motif | IPA<br>(p value)     | AME<br>(adjusted p value) | Common (DEG in<br>pathology complications) | Complications<br>(TF as DEG) | Reference                               |
|-------|-------|----------------------|---------------------------|--------------------------------------------|------------------------------|-----------------------------------------|
| ARNT2 |       | 14/319<br>(1.71E-06) | 174/319<br>(1.30E-13)     | 10<br>(5)                                  | PE<br>SGA                    | Leavey et al. 2015<br>Sober et al. 2015 |
| ELF3  |       | 3/319<br>(1.04E-02)  | 161/319<br>(5.07E-08)     | 2<br>(2)                                   | PE<br>IUGR                   | Sober et al. 2015                       |
| PLAG1 |       | 3/319<br>(4.34E-02)  | 185/319<br>(1.82E-04)     | 2<br>(1)                                   | GDM                          | Sober et al. 2015                       |
| SP2   |       | 2/319<br>(1.87E-02)  | 166/319<br>(2.45E-51)     | 2<br>(1)                                   | IUGR<br>LGA<br>PE            | Sober et al. 2015                       |
| MEF2D |       | 6/319<br>(5.59E-04)  | 124/319<br>(3.84E-23)     | 4<br>(3)                                   | IUGR<br>PE                   | Sober et al. 2015                       |
| MYCN  |       | 25/319<br>(5.51E-13) | 71/319<br>(1.40E-08)      | 2<br>(2)                                   | PE                           | Leavey et al. 2015                      |
| FOS   |       | 49/319<br>(4.45E-24) | 41/319<br>(1.37E-02)      | 7<br>(3)                                   | PE                           | Gormley et al. 2017                     |
| NFYC  |       | 4/319<br>(2.93E-03)  | 38/319<br>(7.54E-10)      | 2<br>(1)                                   | PE                           | Leavey et al. 2015                      |
| CREB1 |       | 22/319<br>(2.69E-05) | 10/319<br>(1.83E-02)      | 2<br>(2)                                   | GDM                          | Bari et al. 2016                        |
| IRF3  |       | 9/319<br>(8.50E-03)  | 162/319<br>(5.83E-54)     | 6<br>(3)                                   | GDM<br>PE                    | Sober et al. 2015<br>Leavey et al. 2015 |

B.

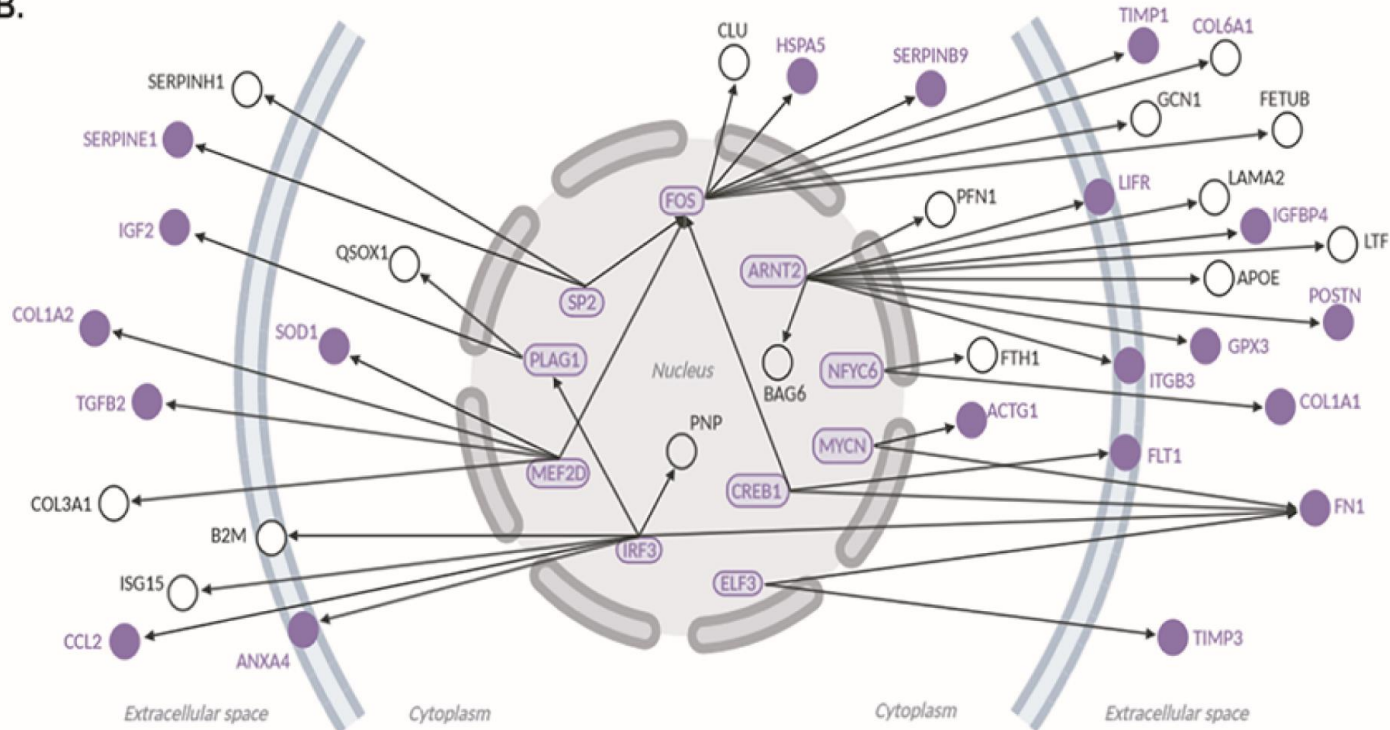

Source: https://www.biorxiv.org/content/10.1101/2020.07.12.198366v1.full.pdf
